# Supplementary material for: Robustness of statistical methods when measure is affected by ceiling and/or floor effect
Source: PubMed Central journal article supplement (PMC6699673; doi:10.1371/journal.pone.0220889), 2019-08-19
Supplement: pone.0220889.s001.pdf [file pone.0220889.s001.pdf]

# Supplement to Robustness of statistical methods when measure is affected by ceiling and/or floor effect

Matus Simkovic<sup>1</sup> and Birgit Träuble<sup>1</sup>

<sup>1</sup>Universität zu Köln, Cologne, Germany

Corresponding author:

Matus Simkovic<sup>1</sup>

Email address: [matus.simkovic@uni-koeln.de](mailto:matus.simkovic@uni-koeln.de)

## ABSTRACT

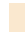

# 1 GENERALIZED GAMMA DISTRIBUTION

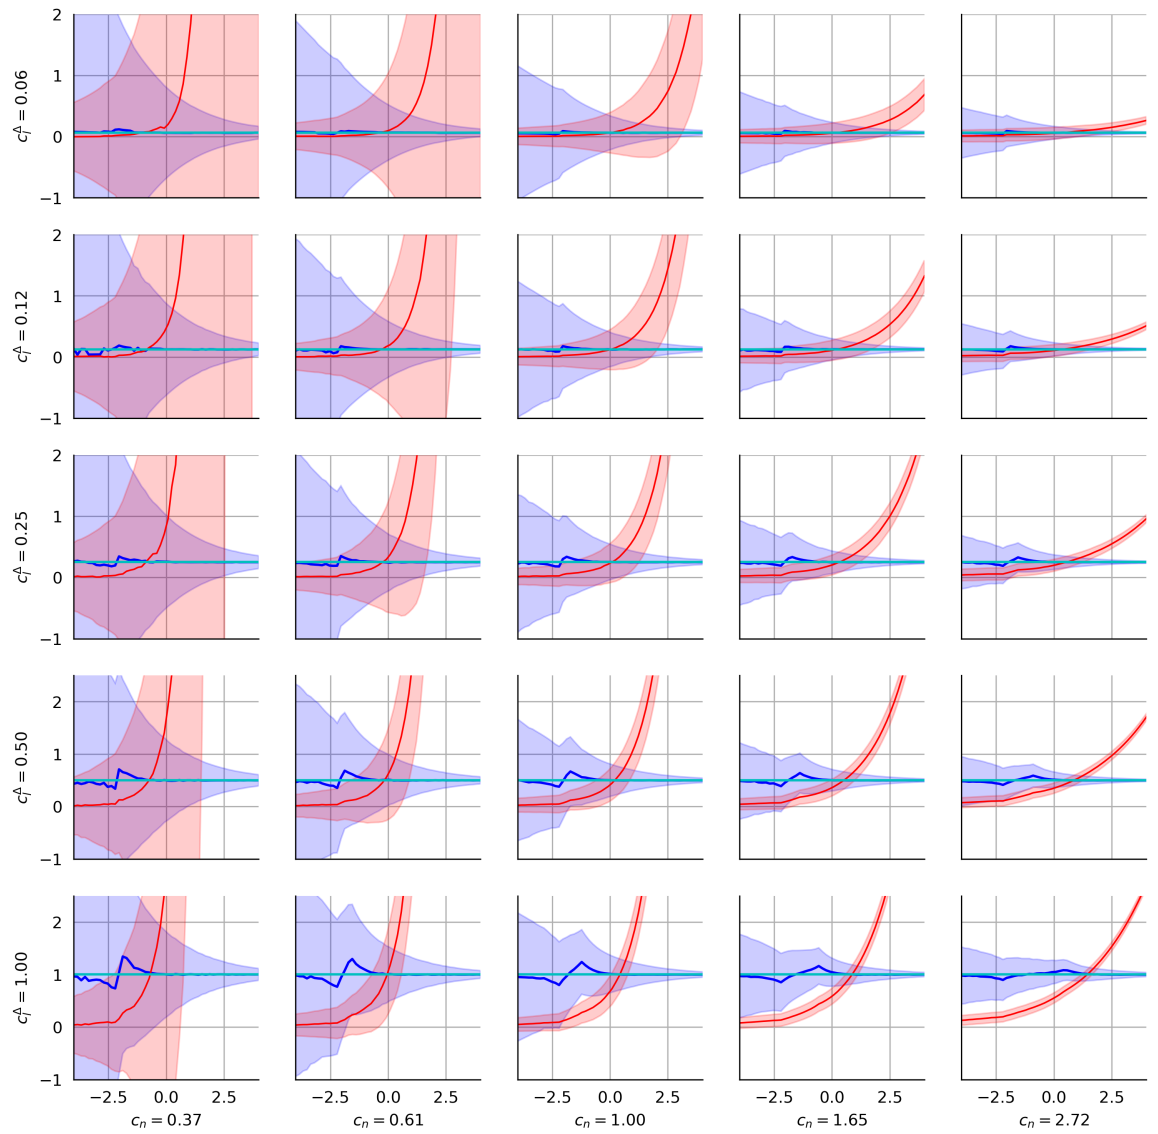

**Figure 1.** Confidence intervals evaluated with Generalized gamma distribution

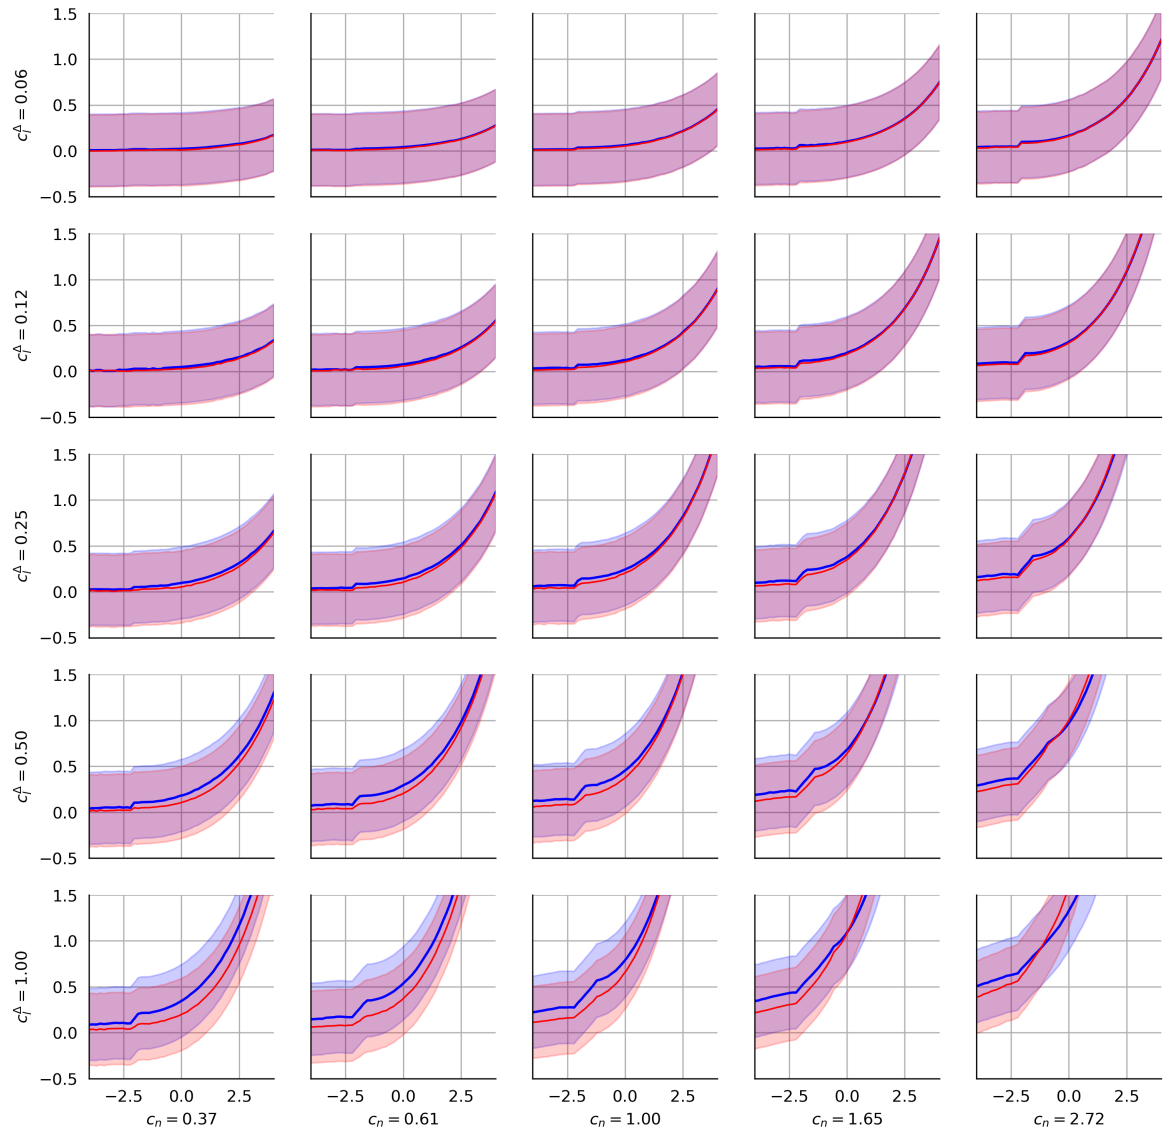

**Figure 2.** Cohen's  $d$  evaluated with Generalized gamma distribution

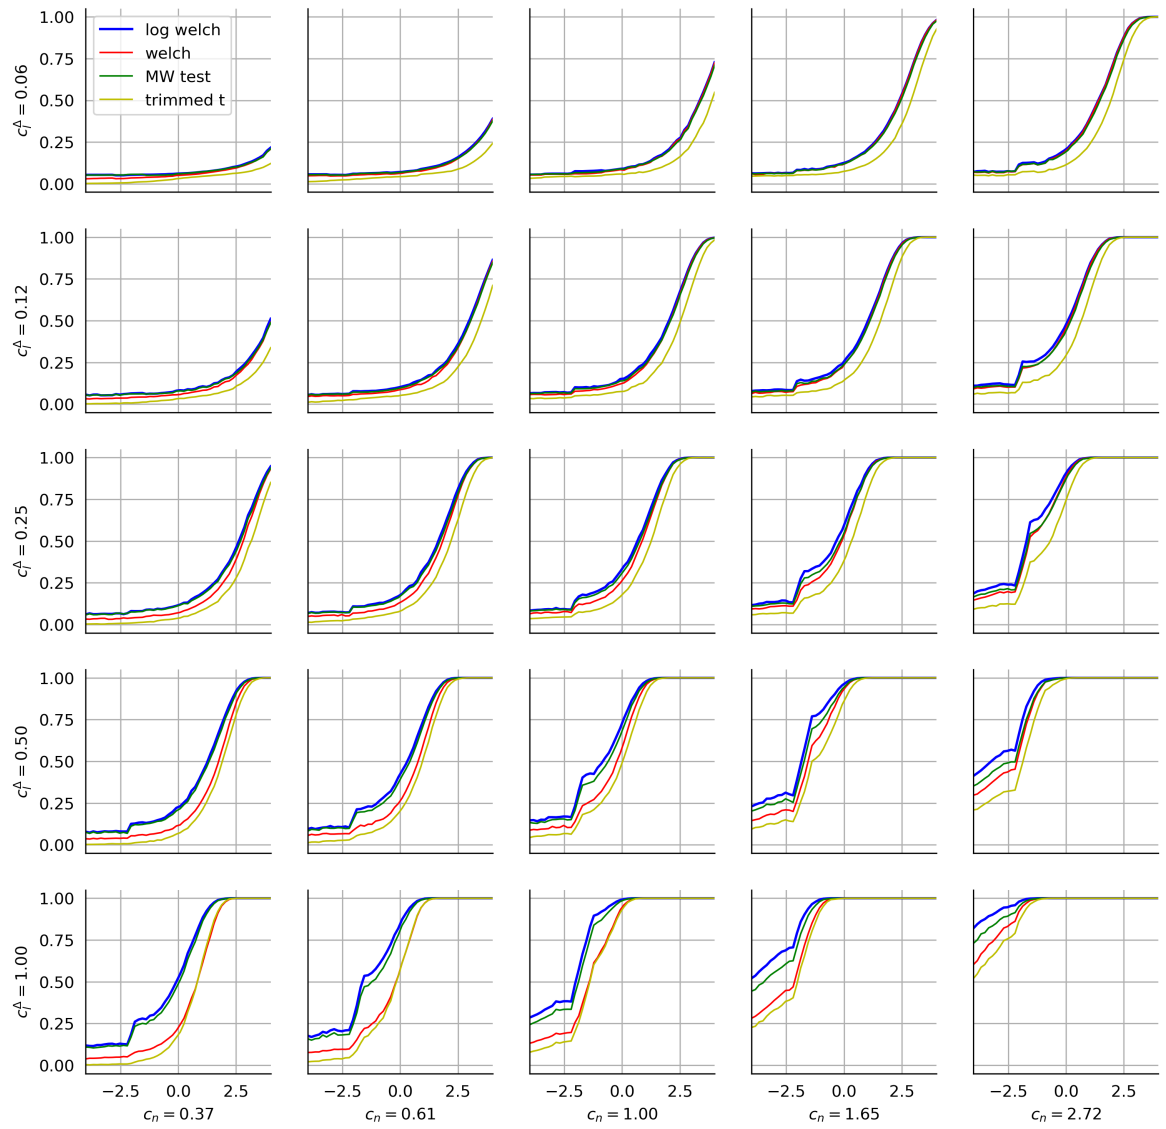

**Figure 3.** Two-group tests evaluated with Generalized gamma distribution

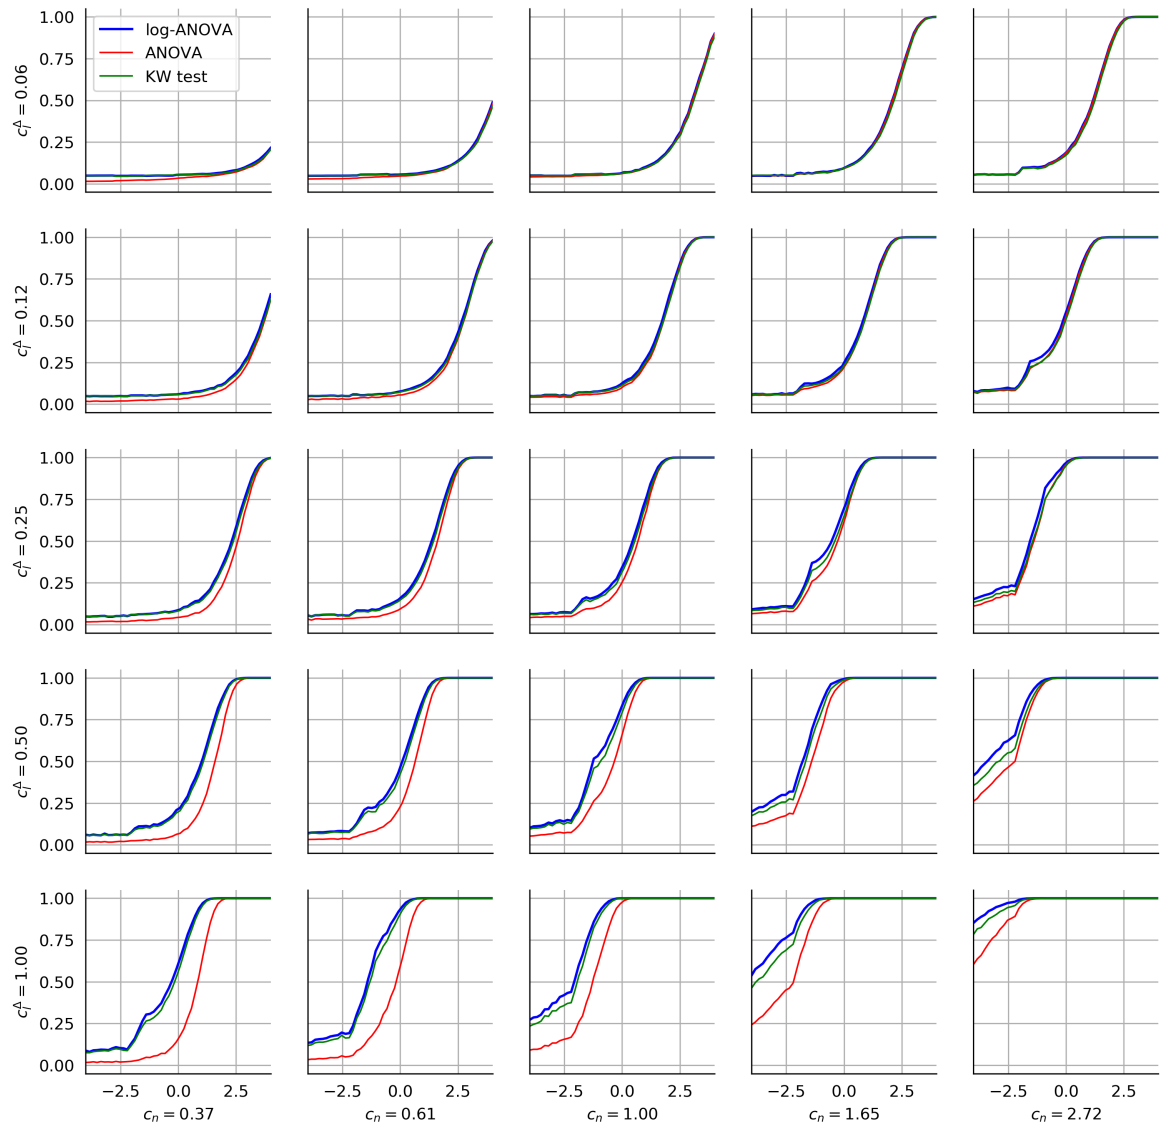

**Figure 4.** Three-group tests evaluated with Generalized gamma distribution

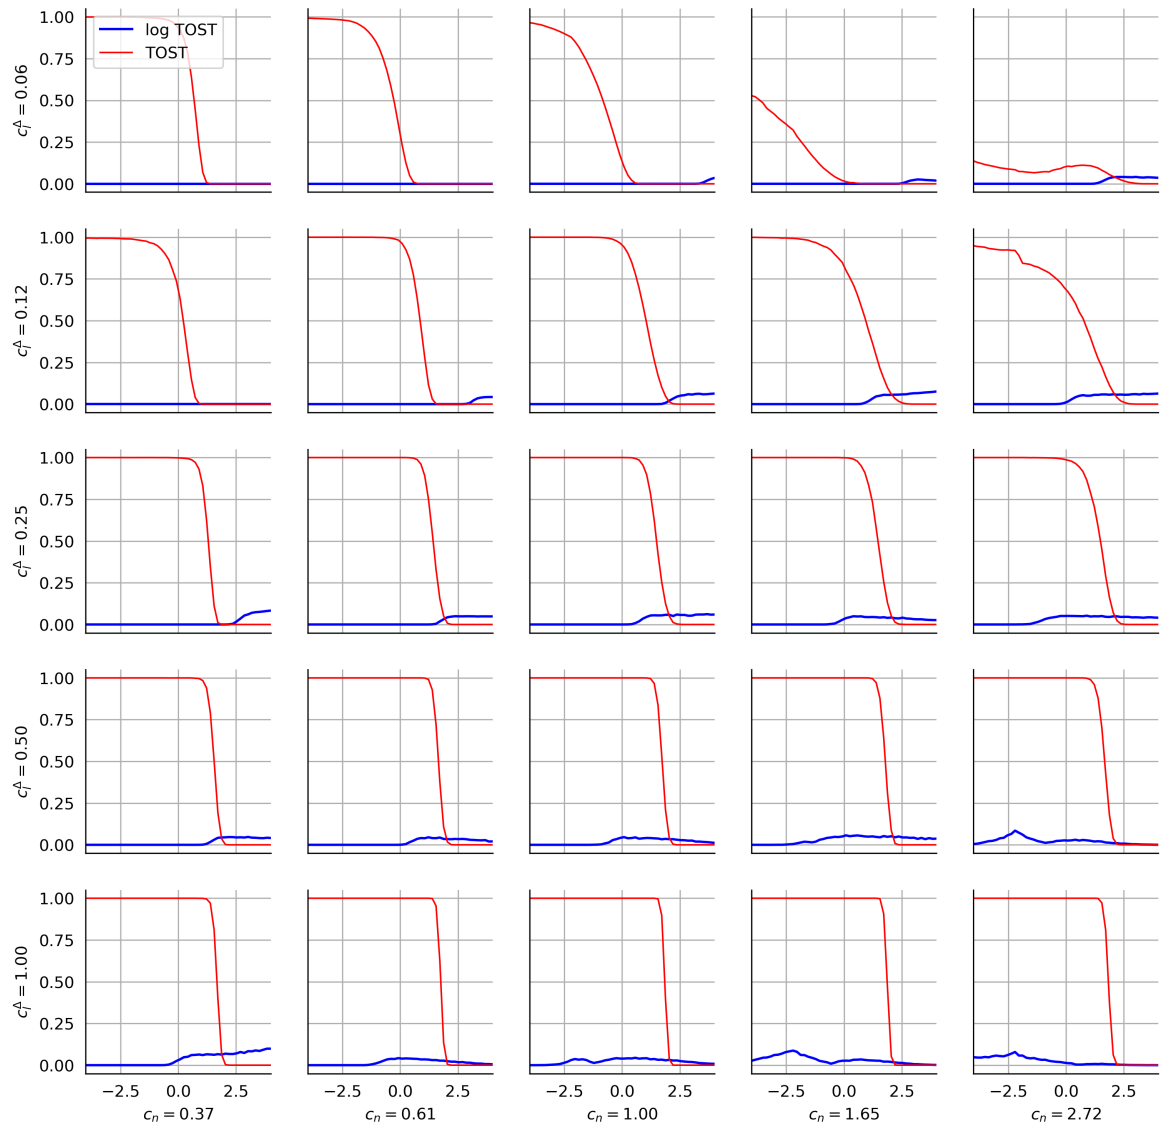

**Figure 5.** TOST procedure evaluated with Generalized gamma distribution

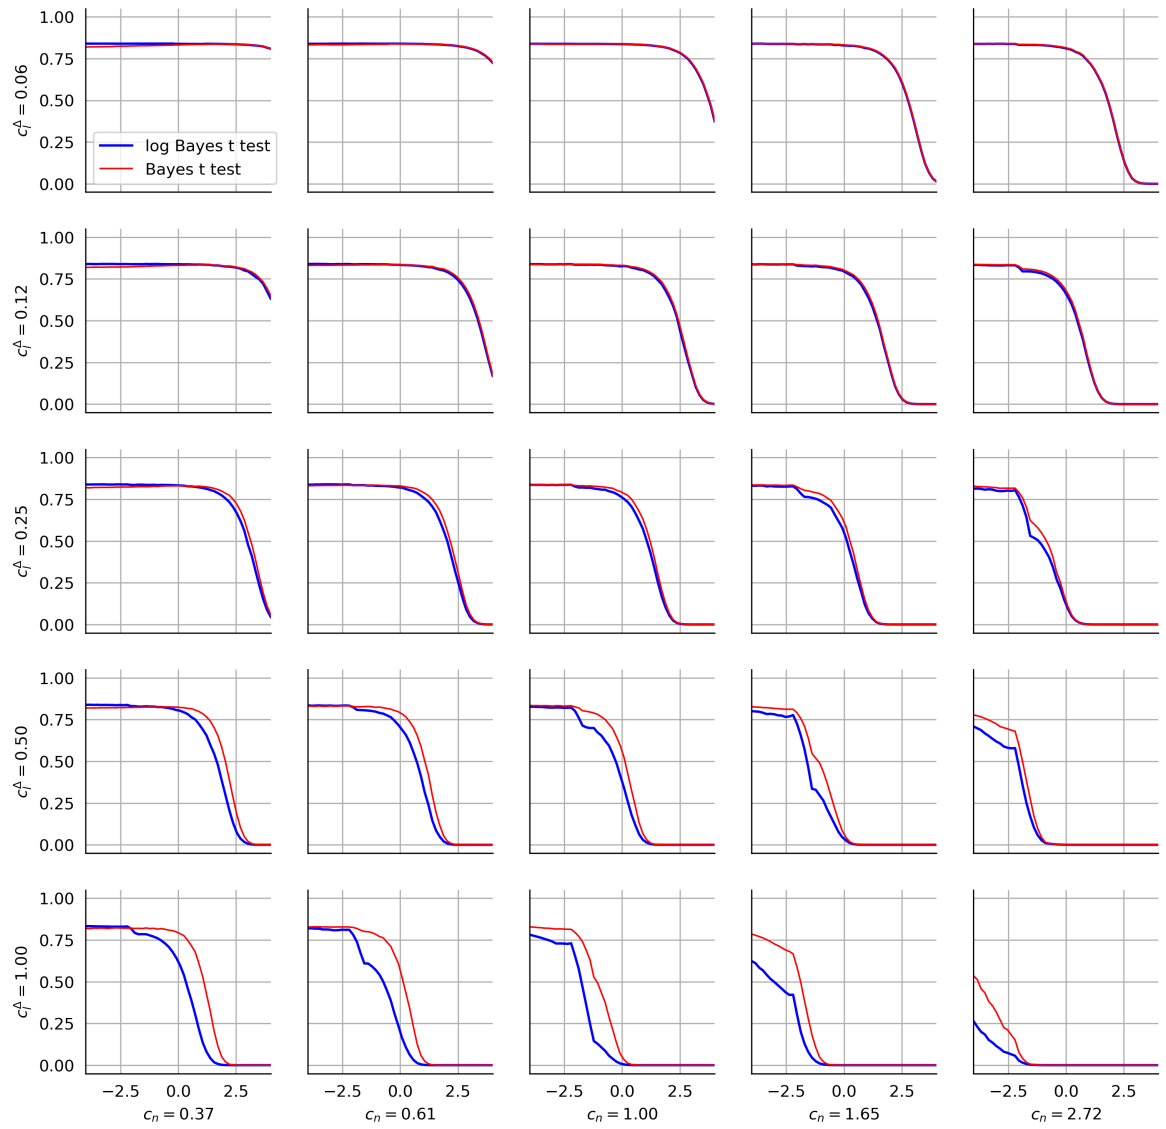

**Figure 6.** Bayesian t test evaluated with Generalized gamma distribution

## 2 WALD DISTRIBUTION

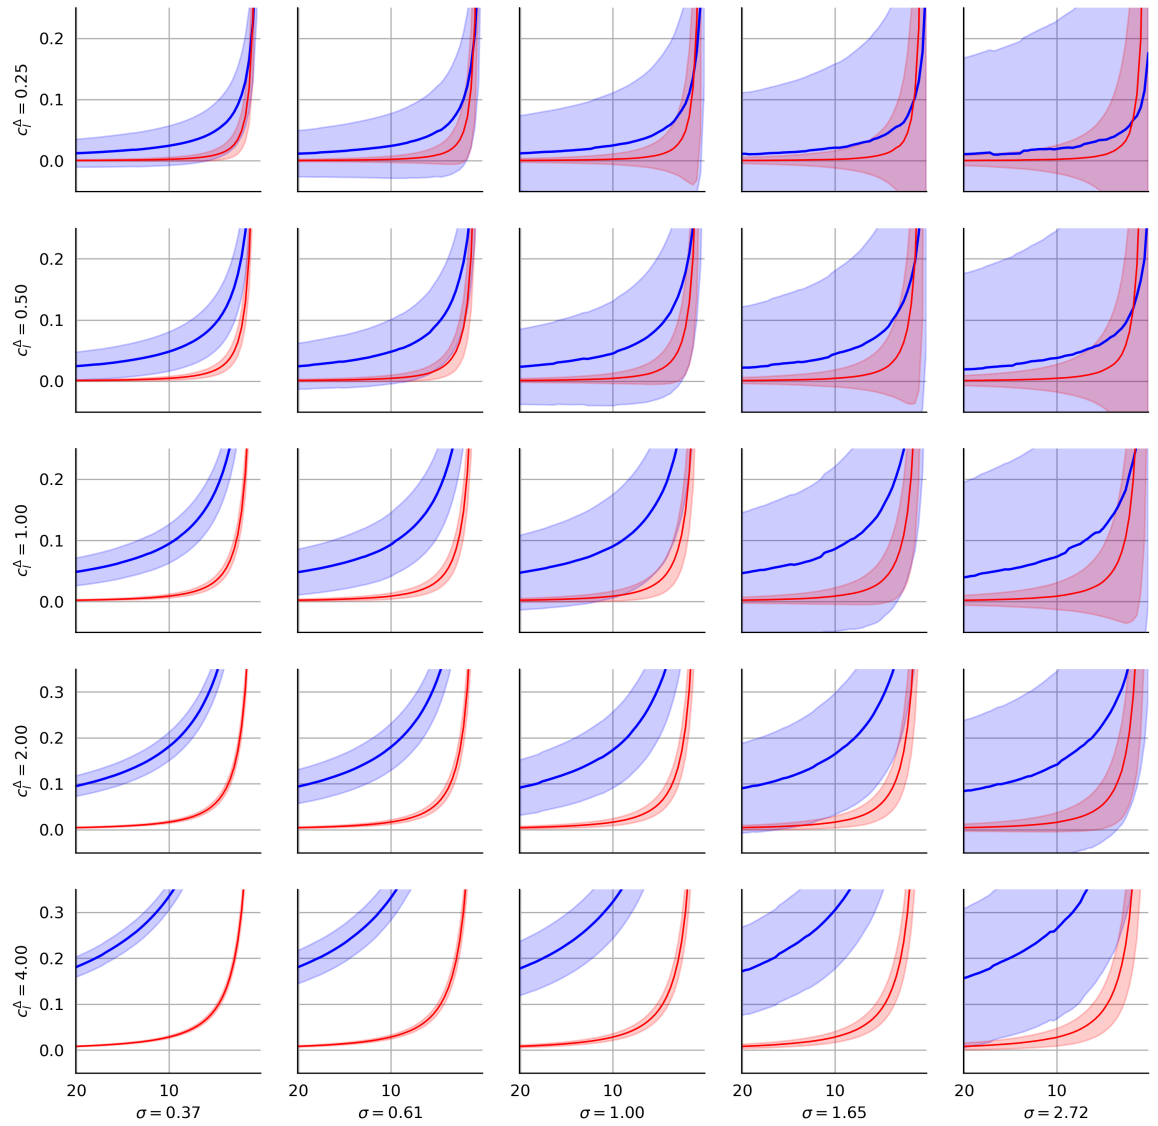

**Figure 7.** Confidence intervals evaluated with Wald distribution



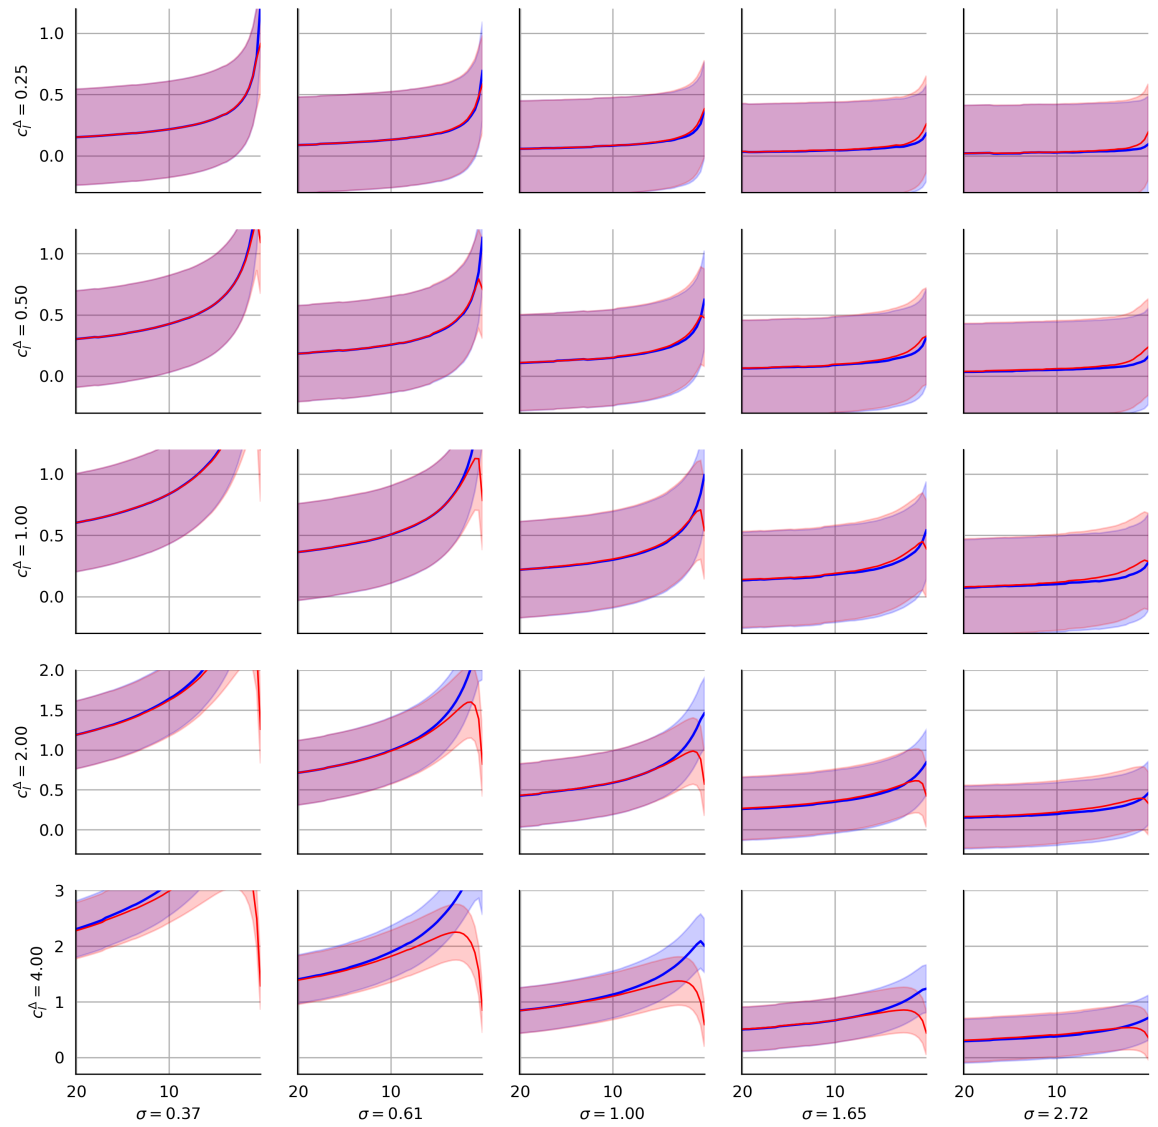

**Figure 8.** Cohen's  $d$  evaluated with Wald distribution

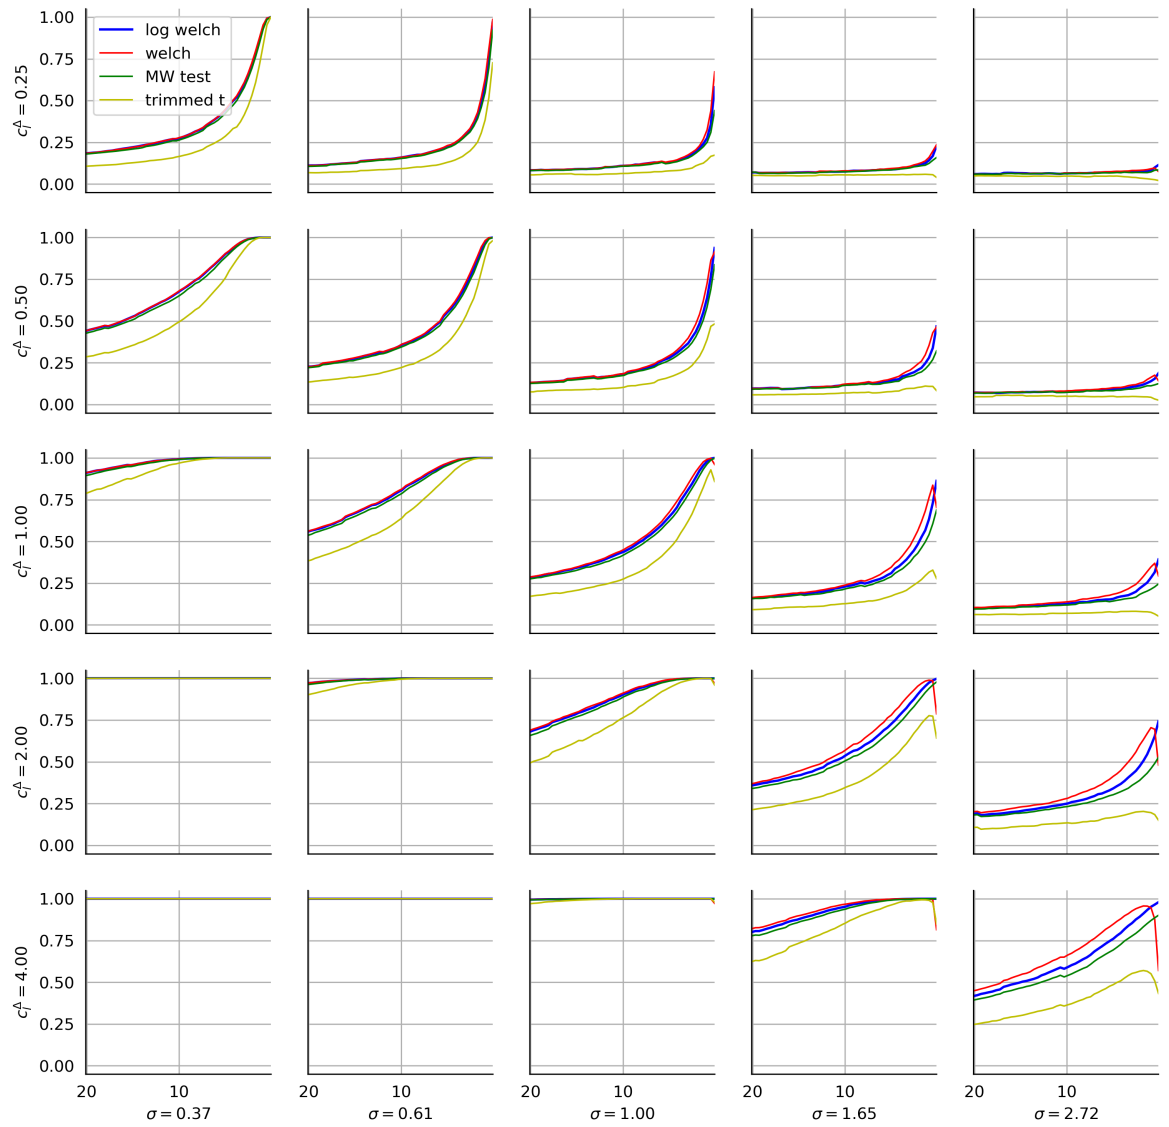

**Figure 9.** Two-group tests evaluated with Wald distribution

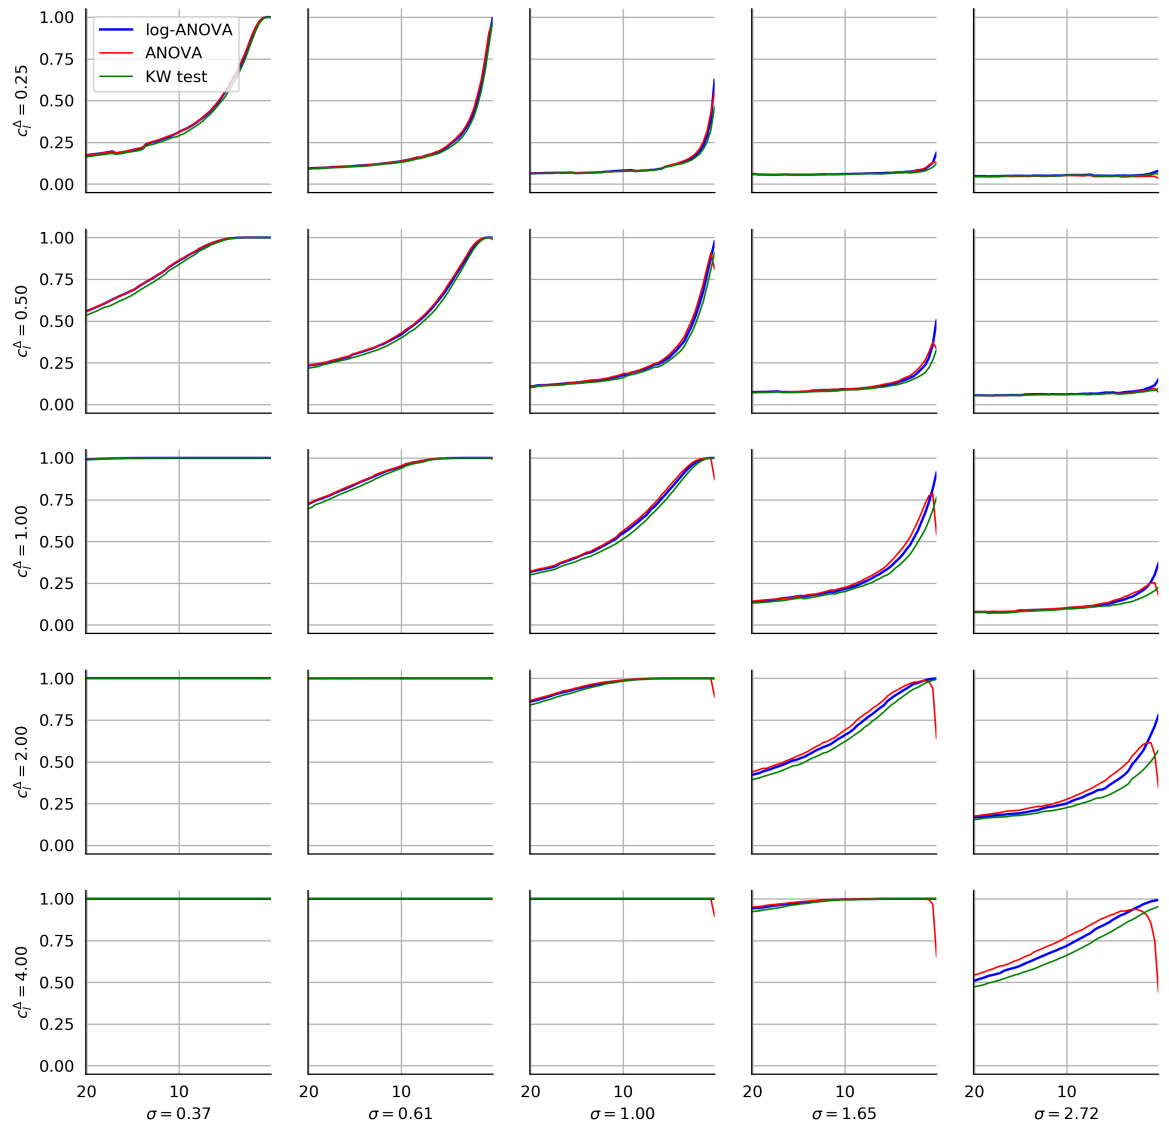

**Figure 10.** Three-group tests evaluated with Wald distribution

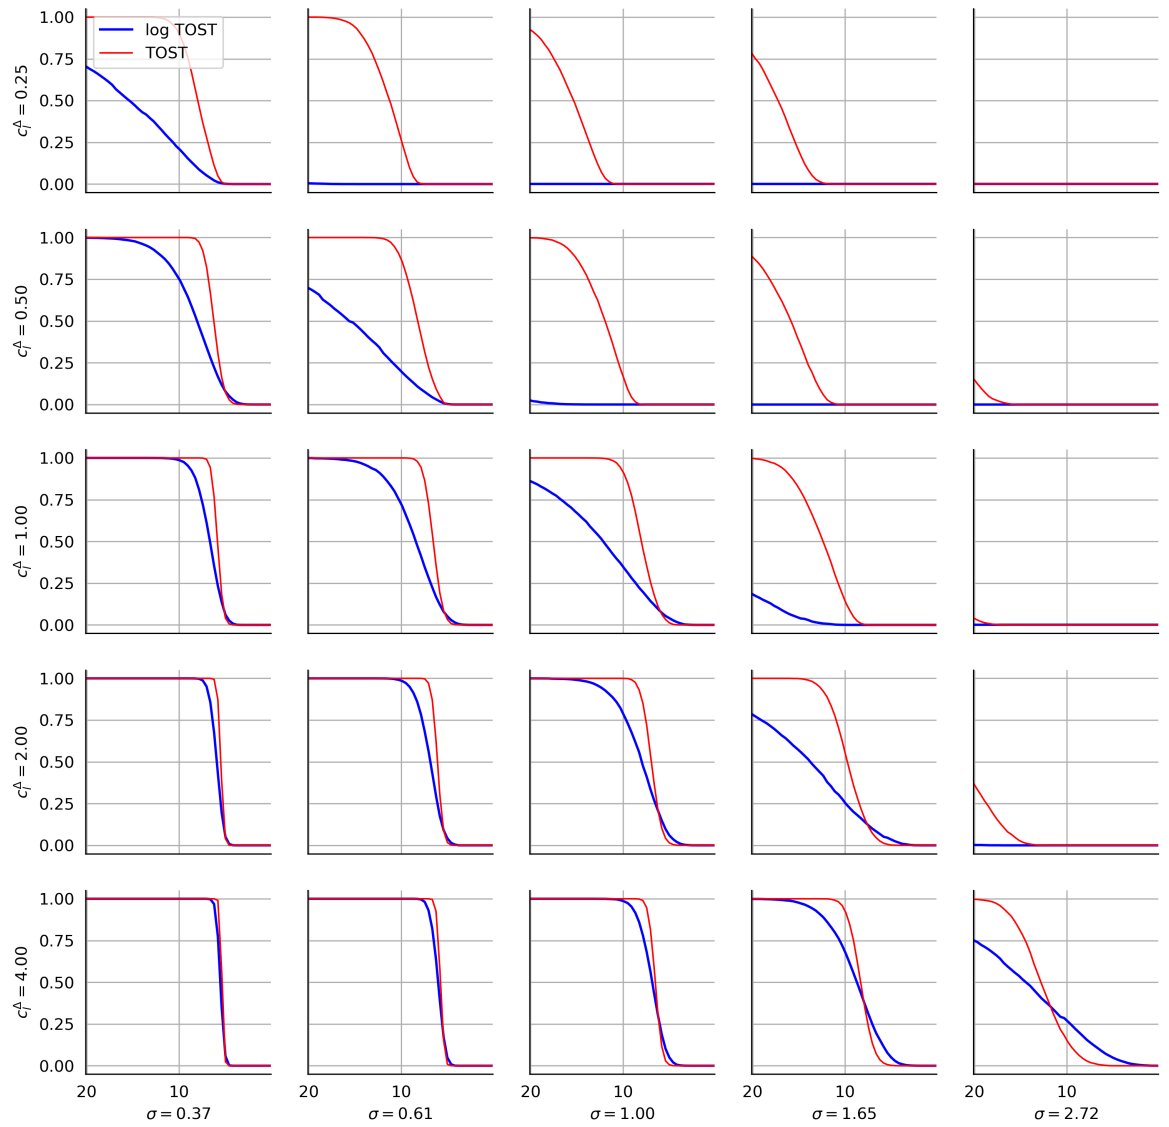

**Figure 11.** TOST procedure evaluated with Wald distribution

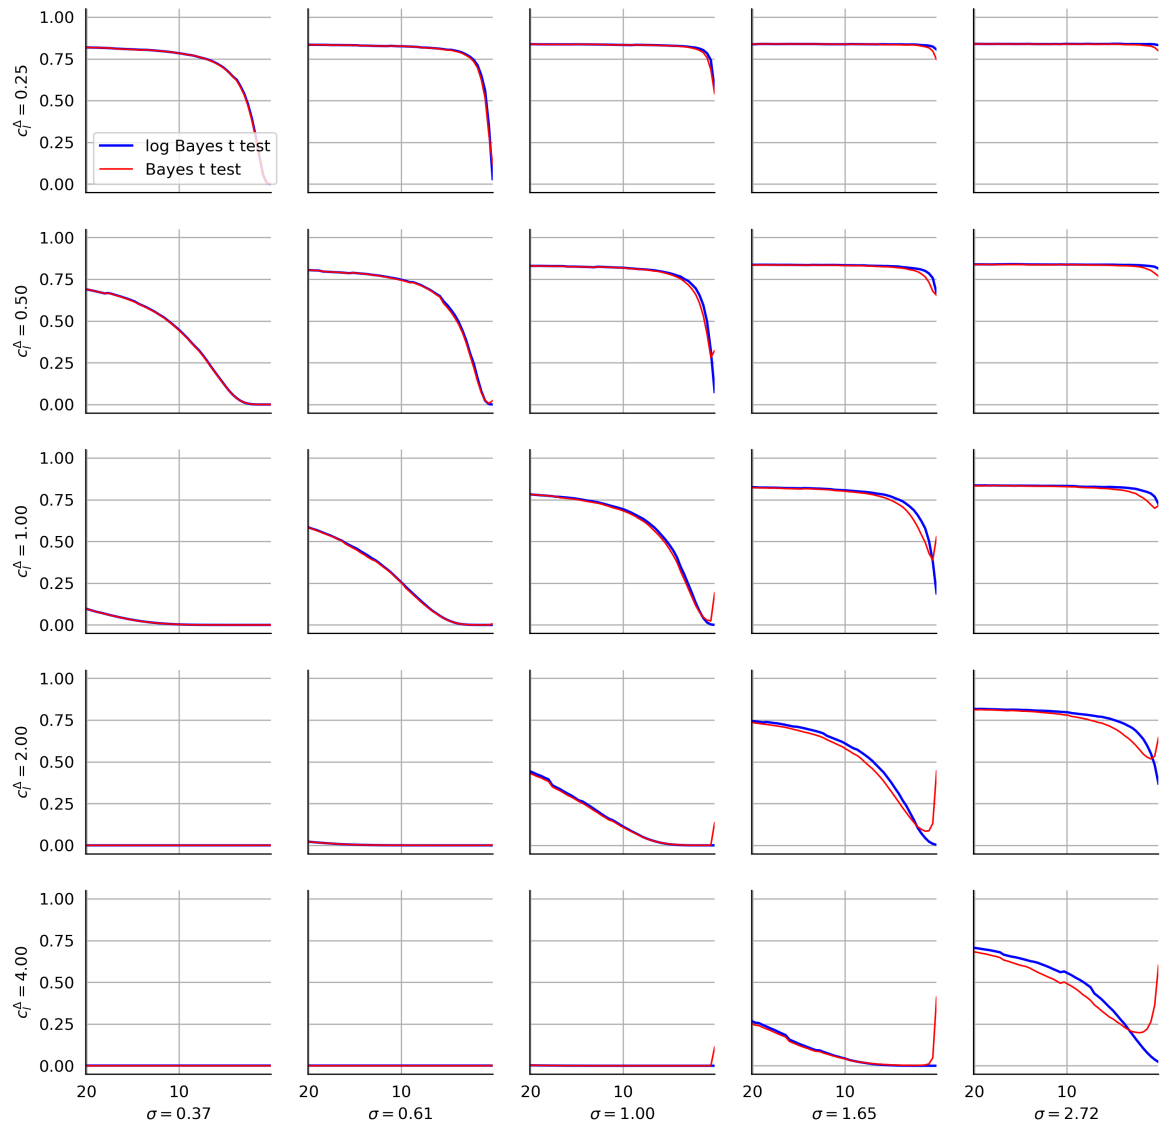

**Figure 12.** Bayesian t test evaluated with Wald distribution

### 3 BETA PRIME DISTRIBUTION

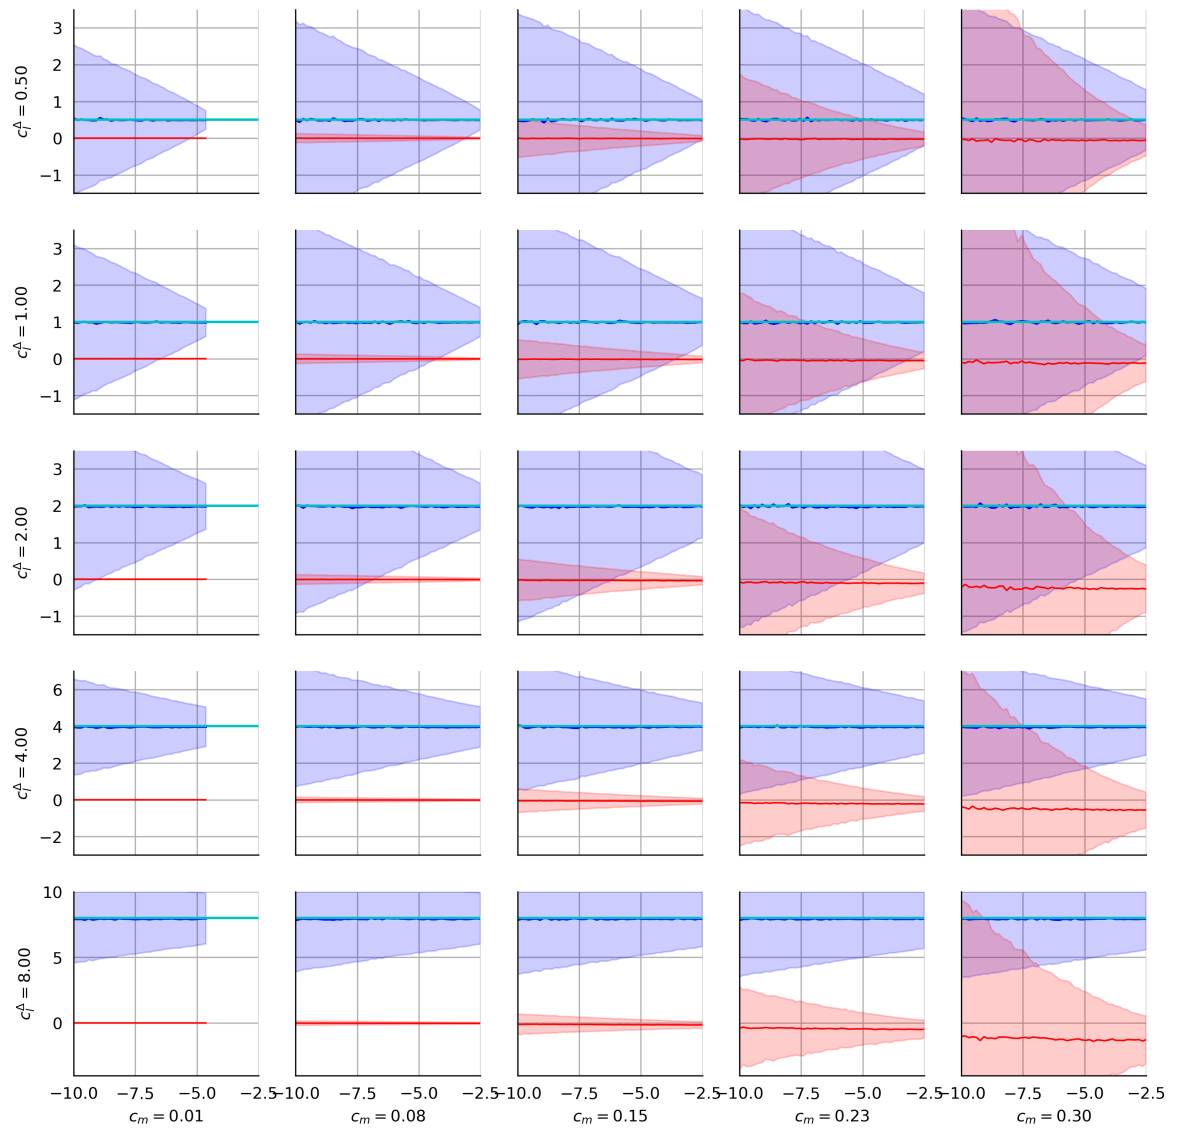

Figure 13. Confidence intervals evaluated with Beta prime distribution

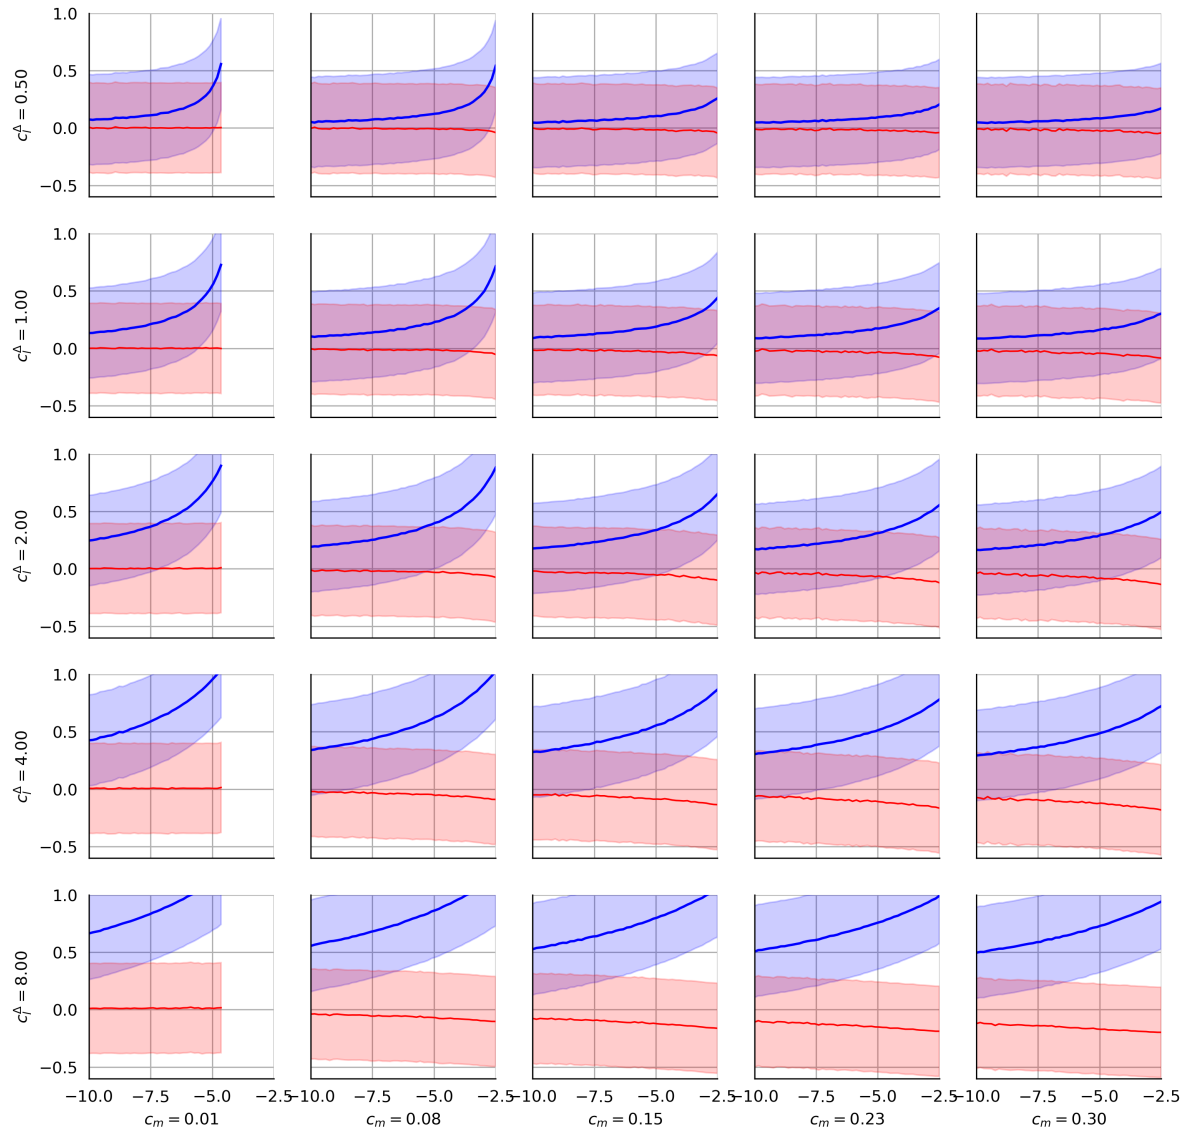

**Figure 14.** Cohen's  $d$  evaluated with Beta prime distribution

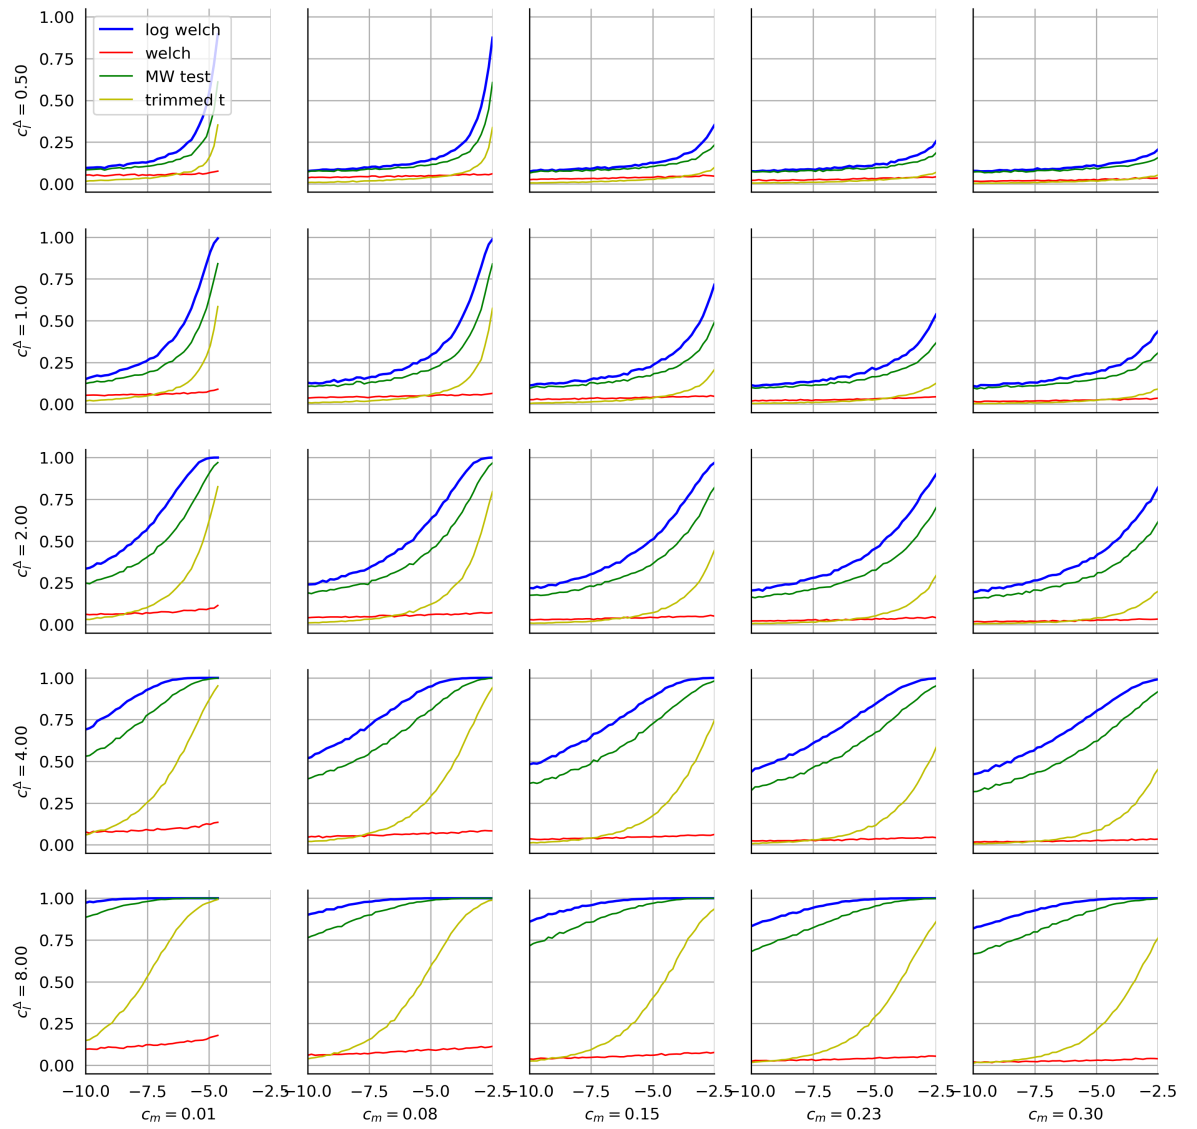

**Figure 15.** Two-group tests evaluated with Beta prime distribution



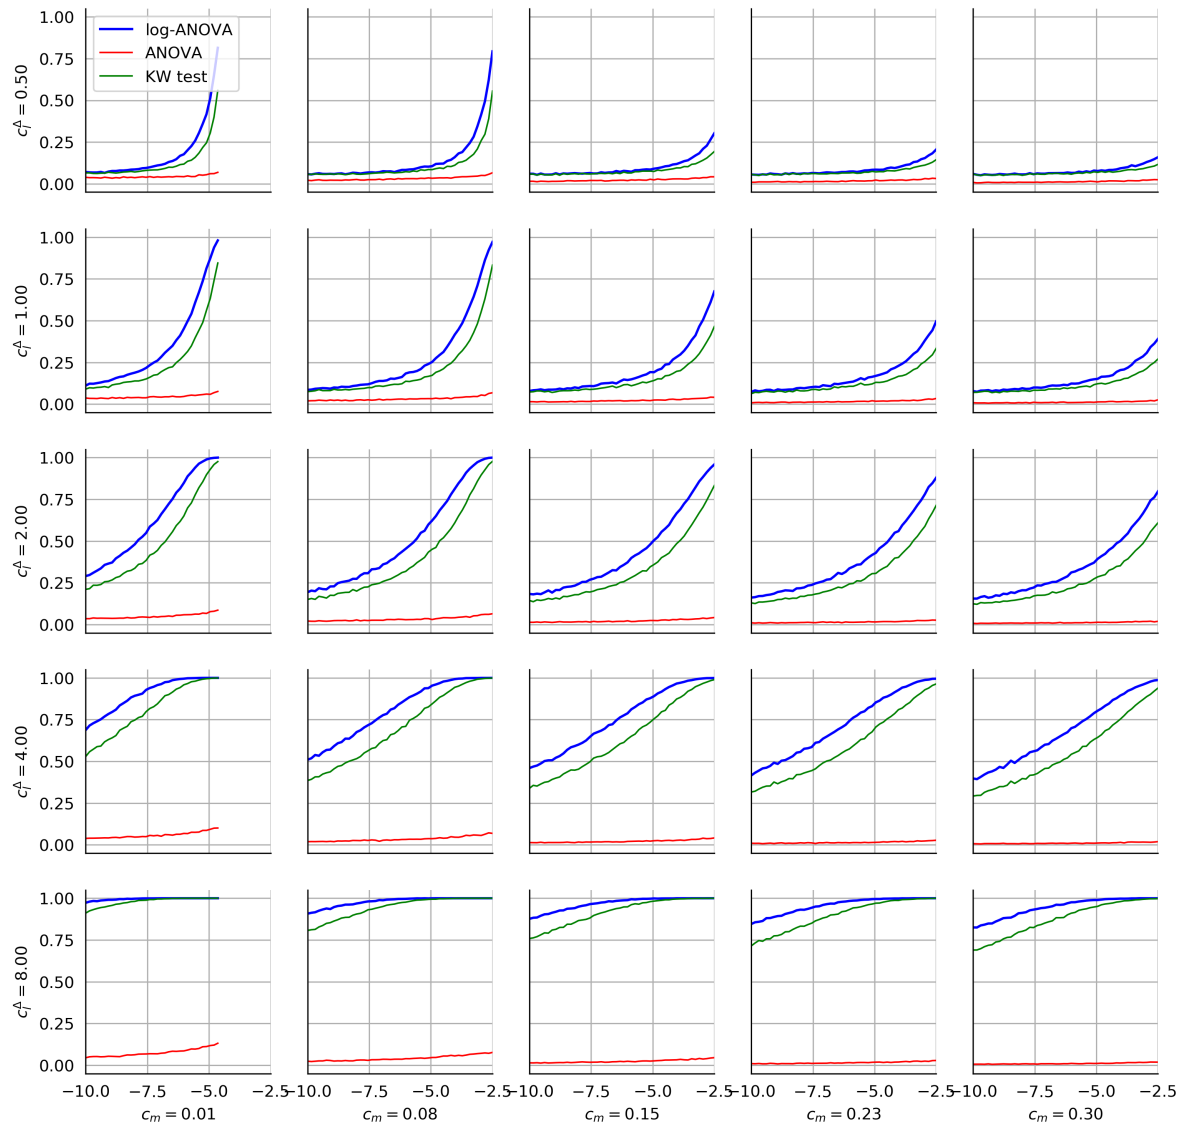

**Figure 16.** Three-group tests evaluated with Beta prime distribution

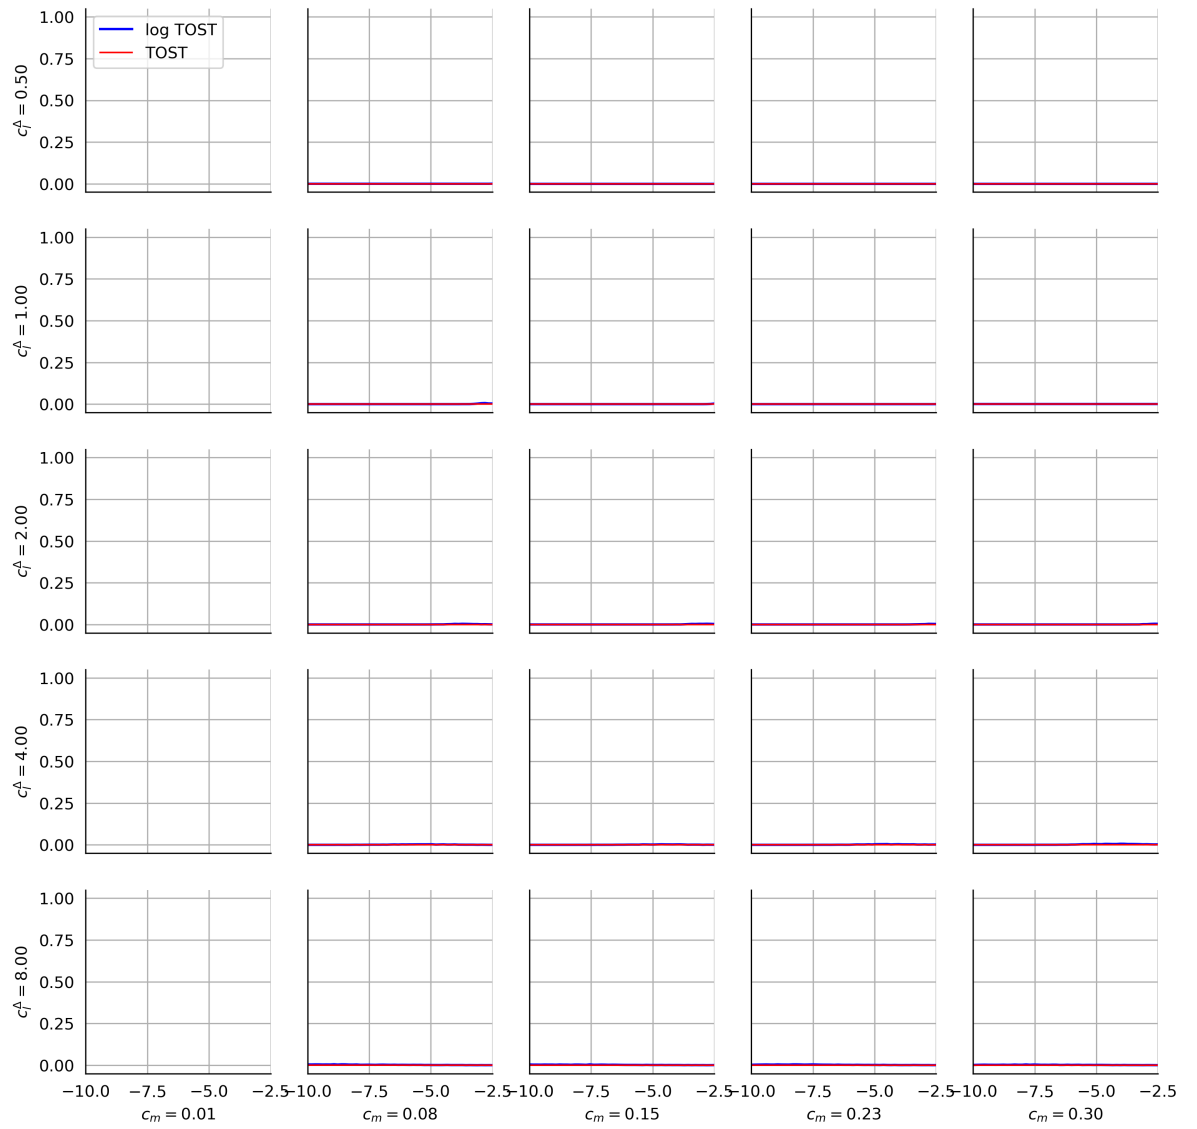

**Figure 17.** TOST procedure evaluated with Beta prime distribution

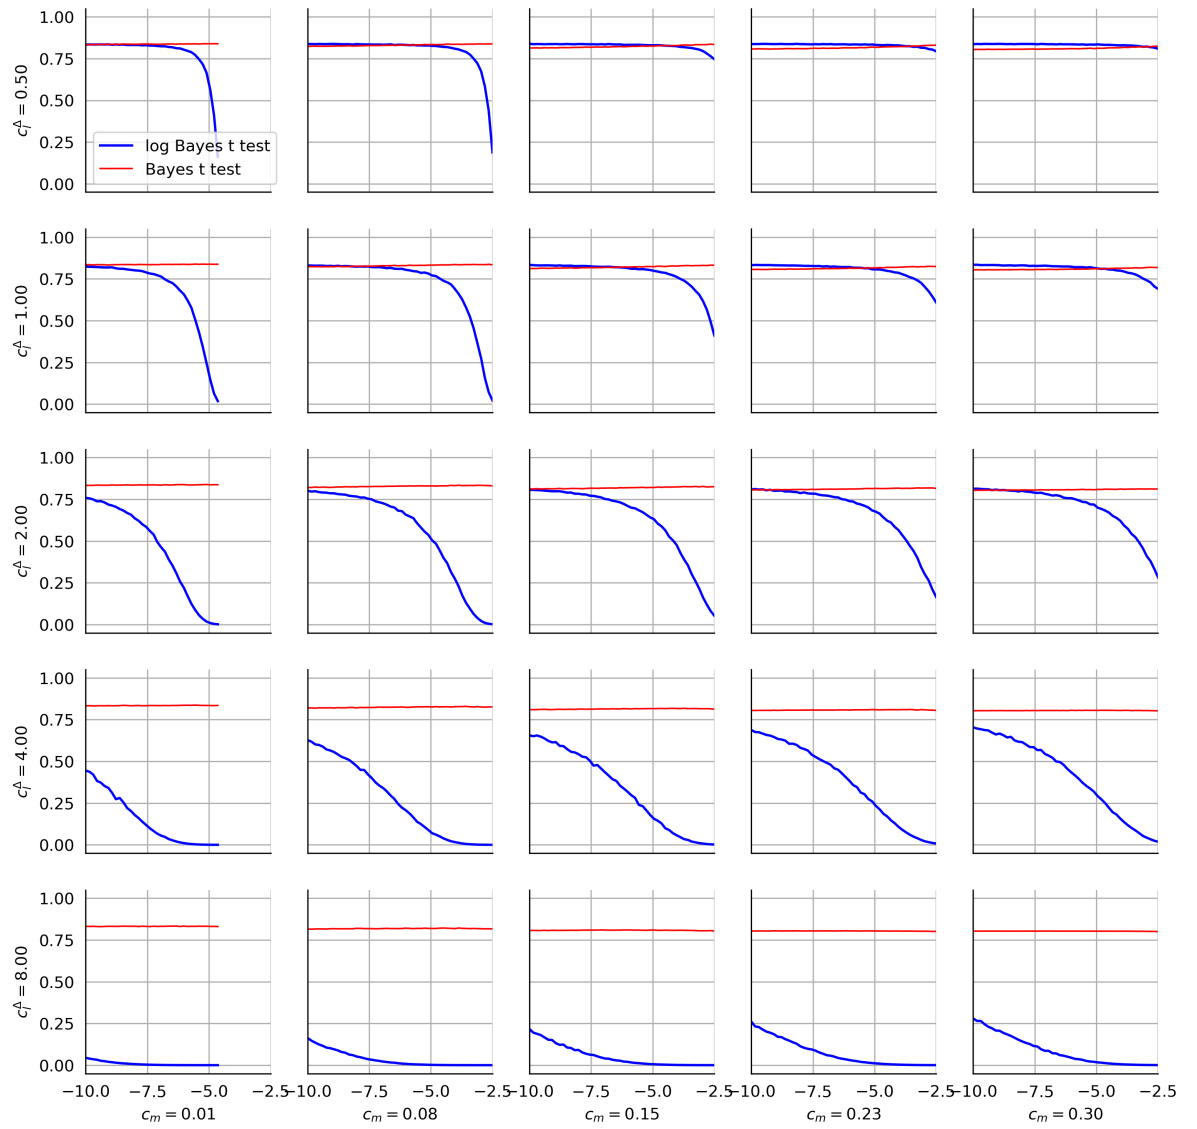

**Figure 18.** Bayesian t test evaluated with Beta prime distribution

## 4 BETA DISTRIBUTION

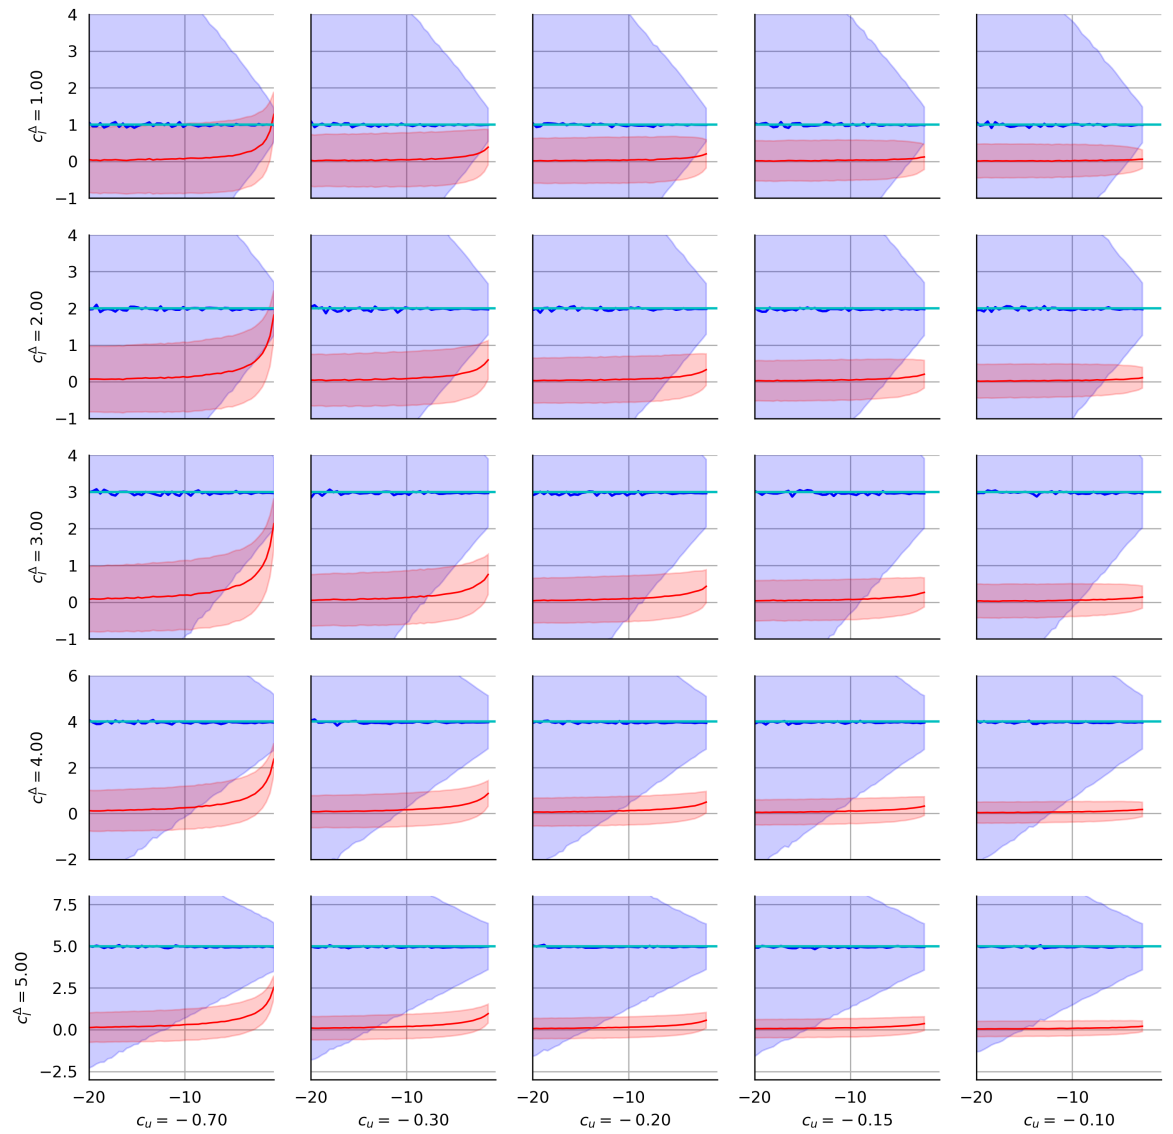

**Figure 19.** Confidence intervals evaluated with Beta distribution

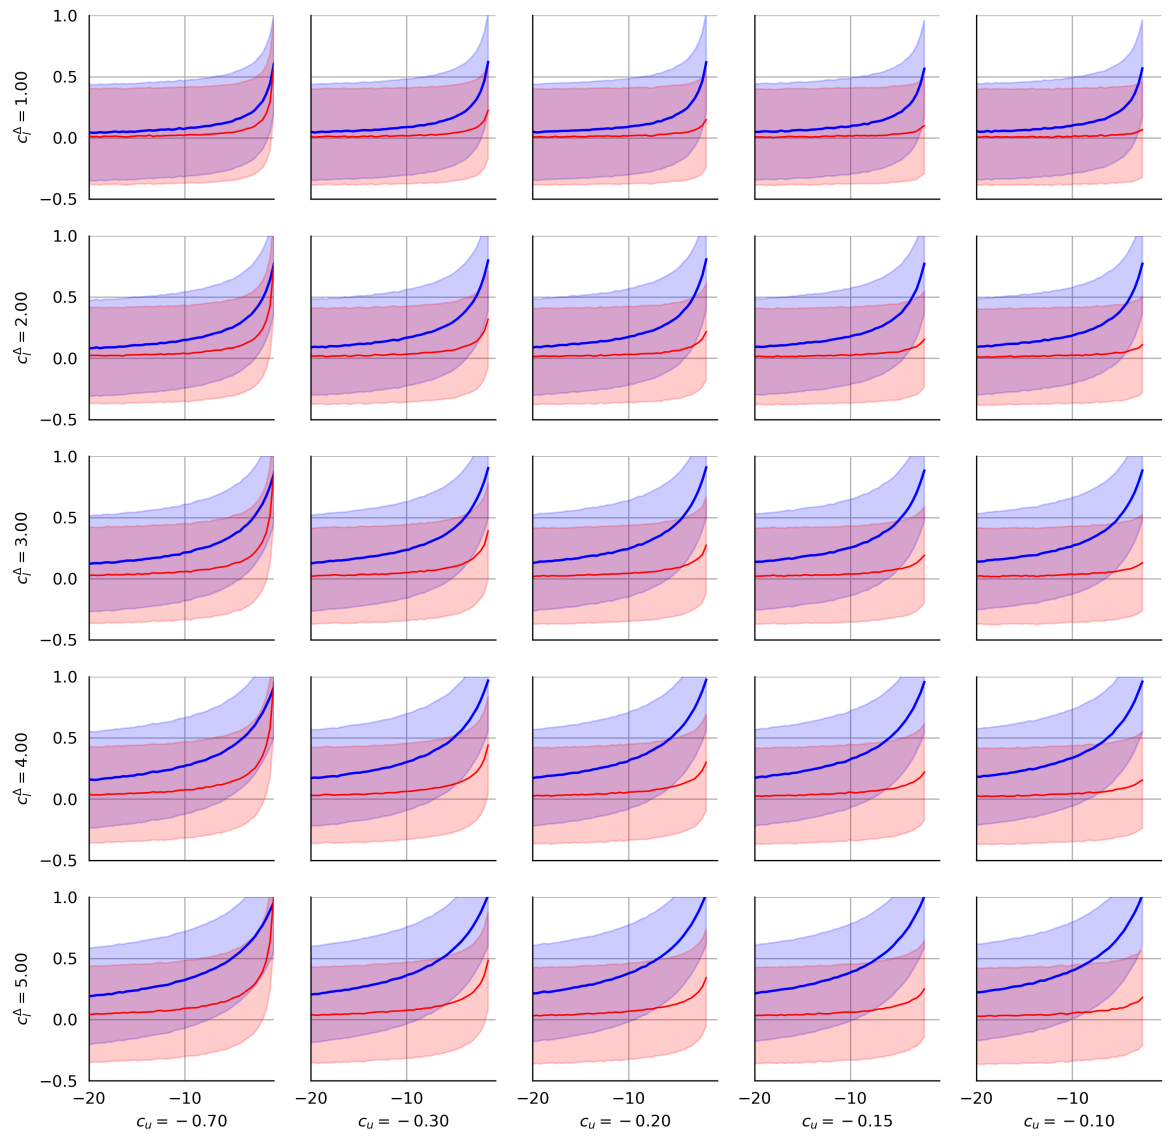

**Figure 20.** Cohen's  $d$  evaluated with Beta distribution

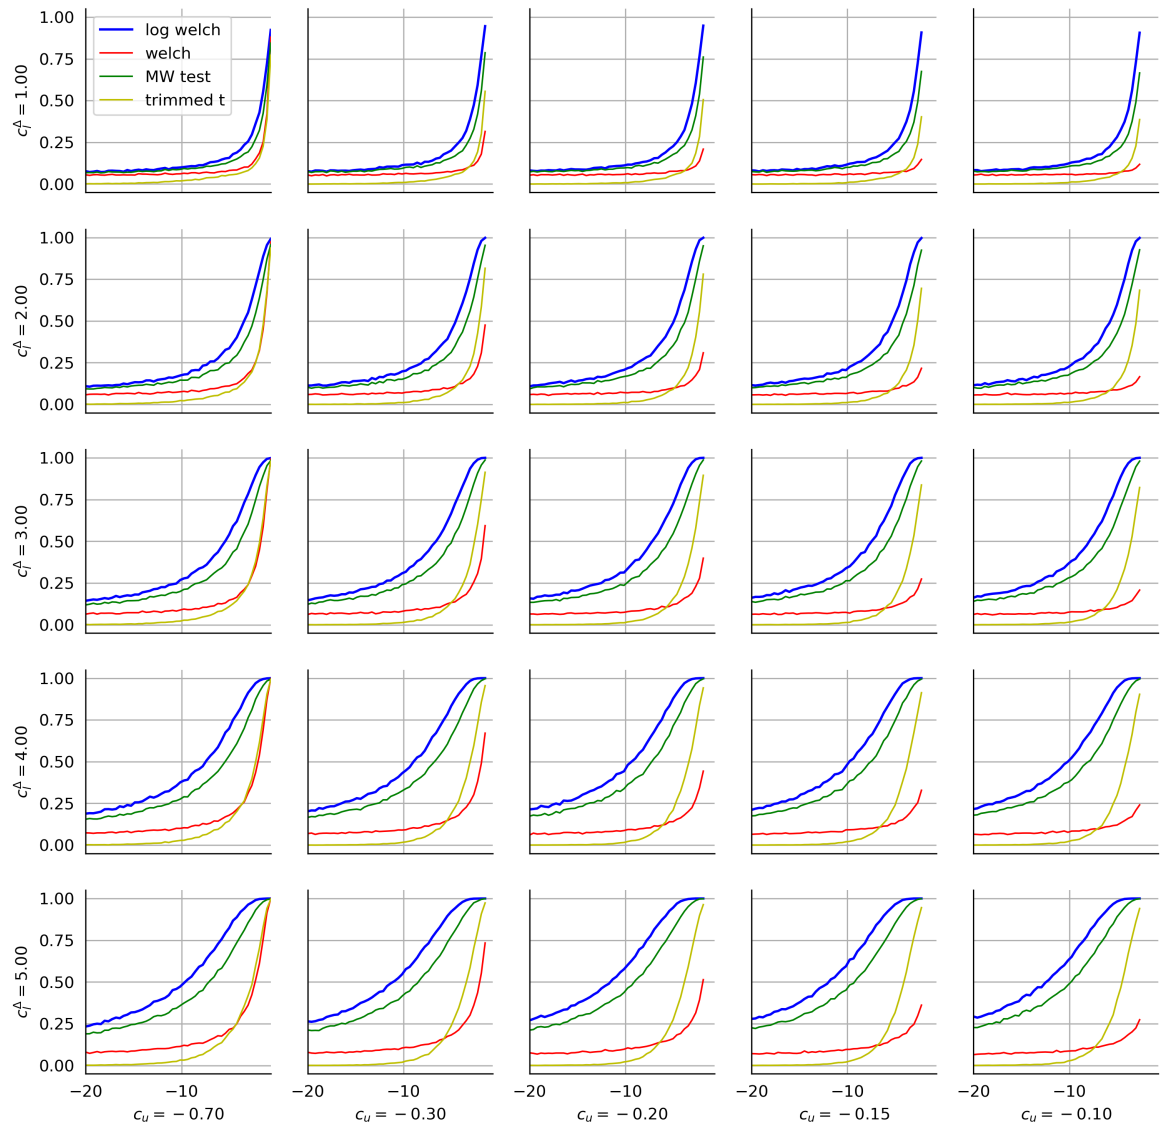

**Figure 21.** Two-group tests evaluated with Beta distribution

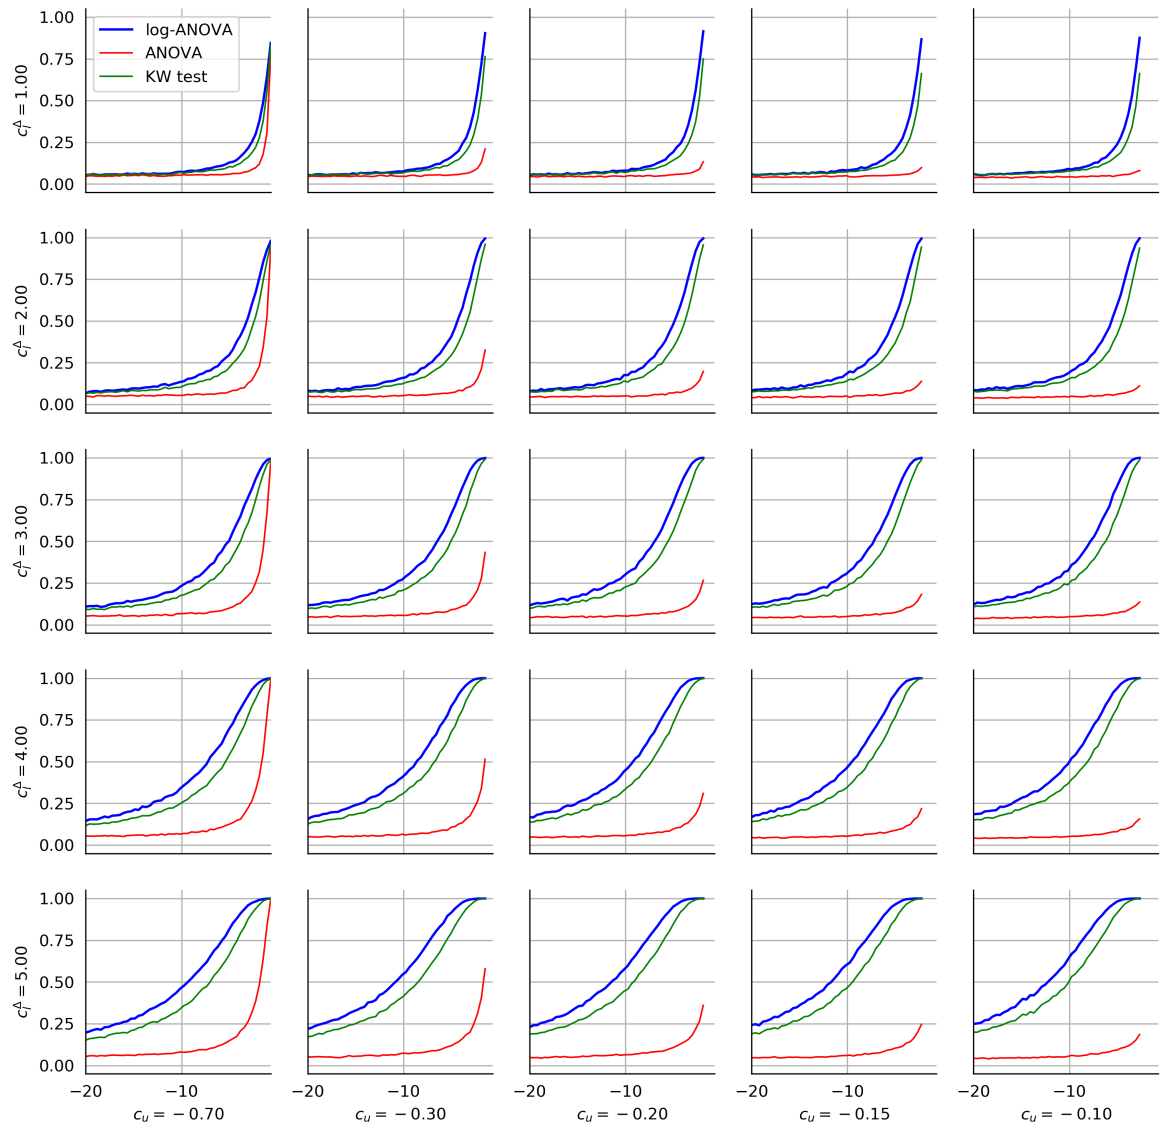

**Figure 22.** Three-group tests evaluated with Beta distribution

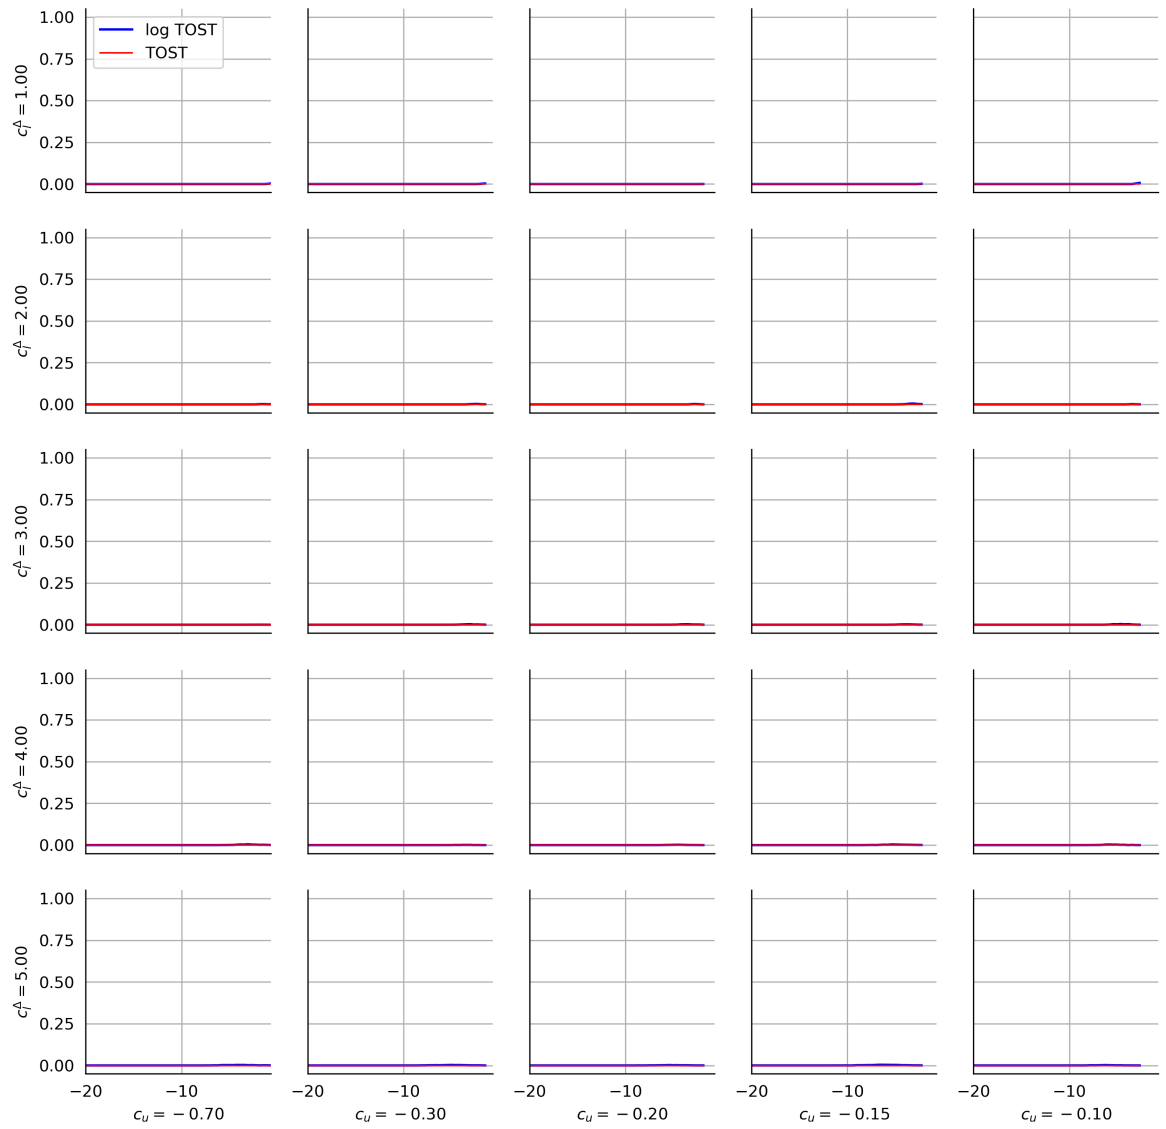

**Figure 23.** TOST procedure evaluated with Beta distribution



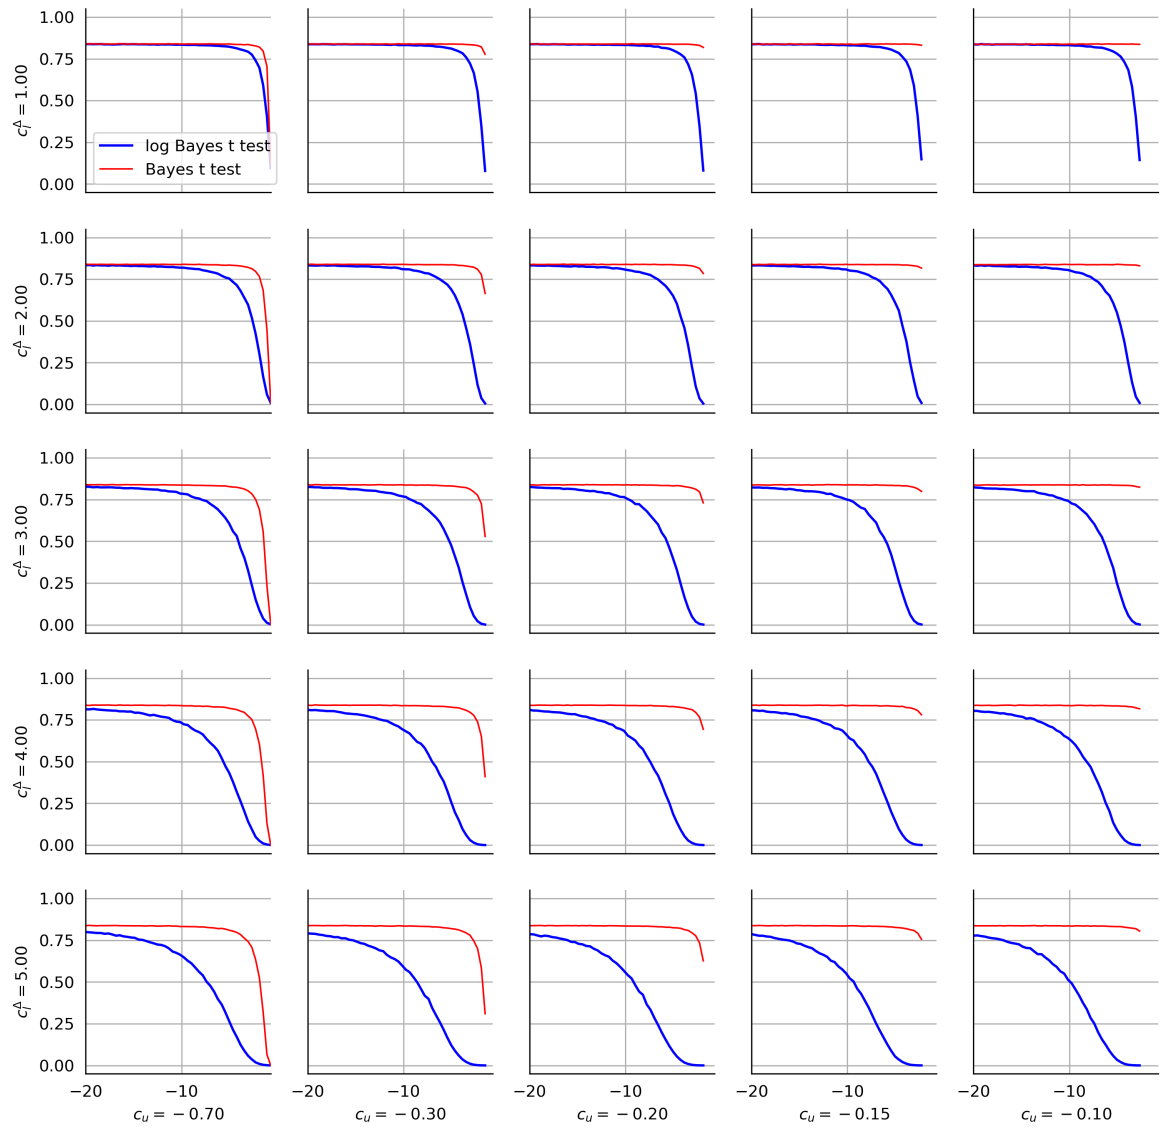

**Figure 24.** Bayesian t test evaluated with Beta distribution

## 5 BETA-BINOMIAL DISTRIBUTION

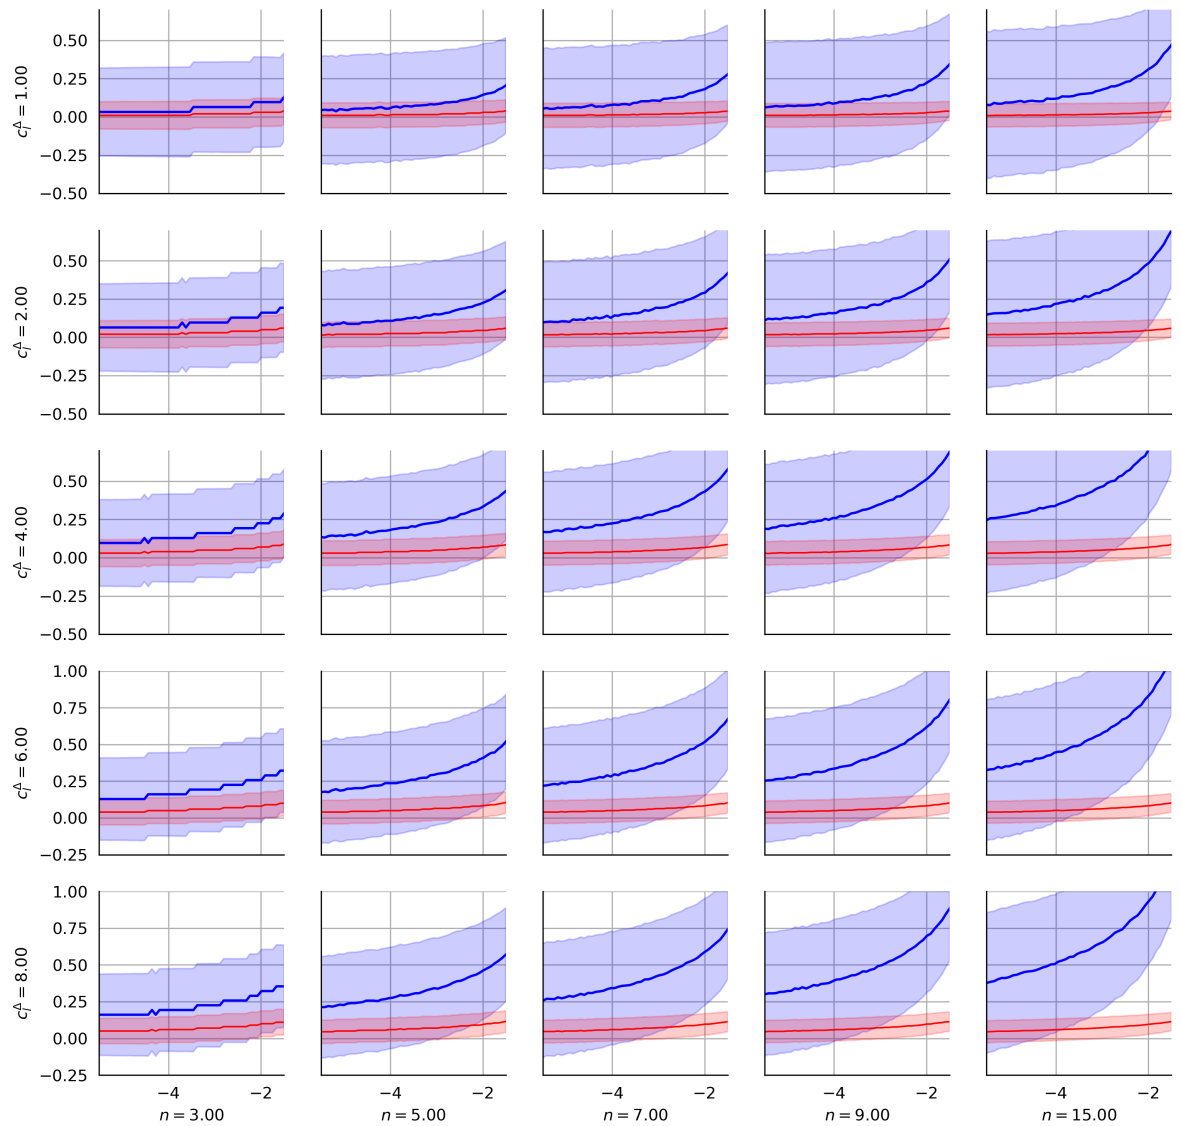

**Figure 25.** Confidence intervals evaluated with Beta-binomial distribution

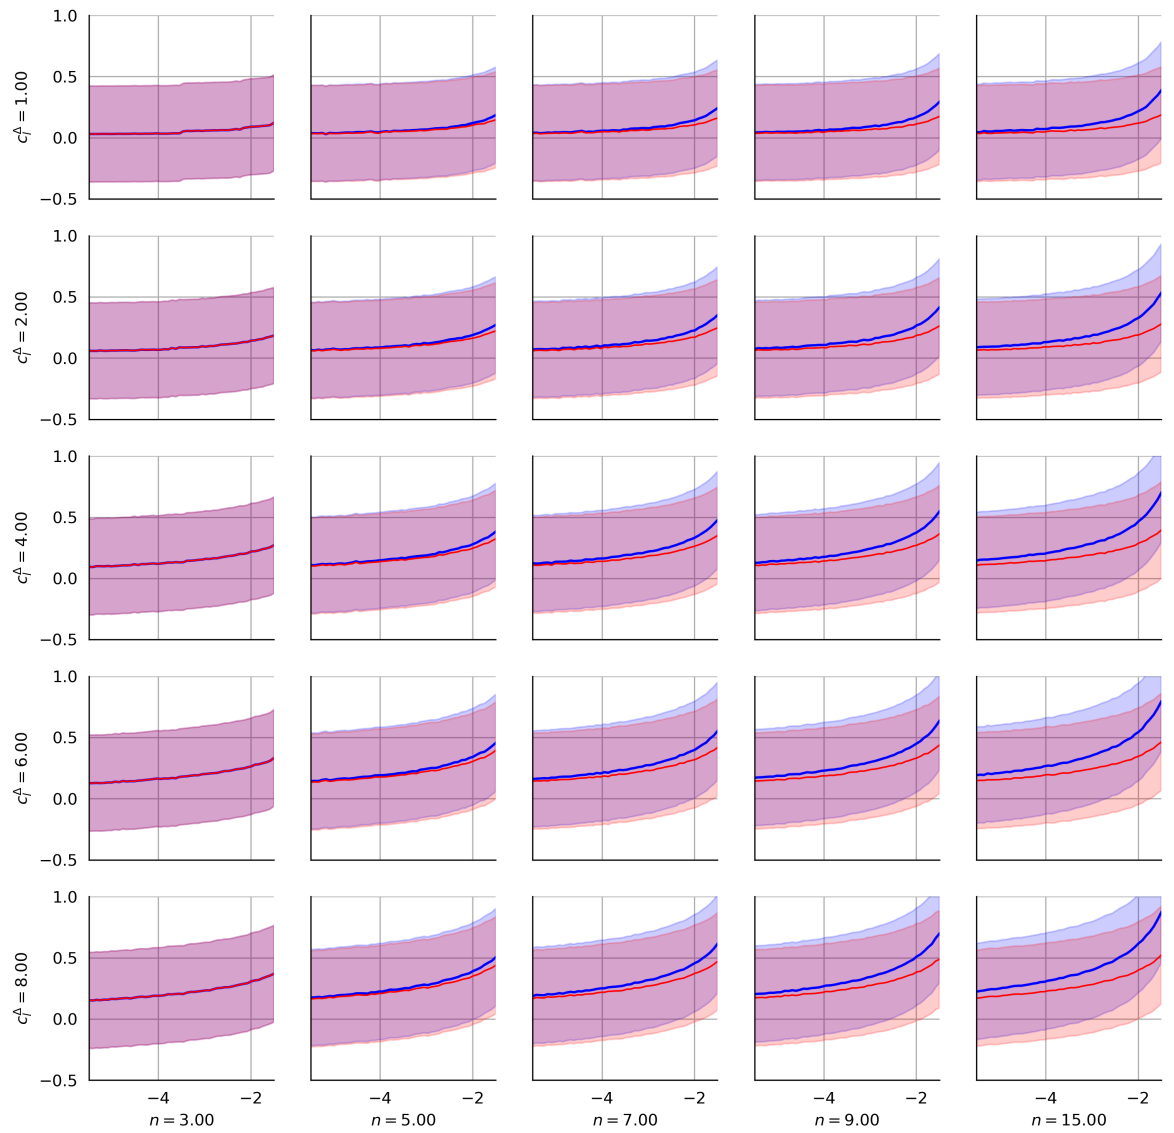

**Figure 26.** Cohen's  $d$  evaluated with Beta-binomial distribution

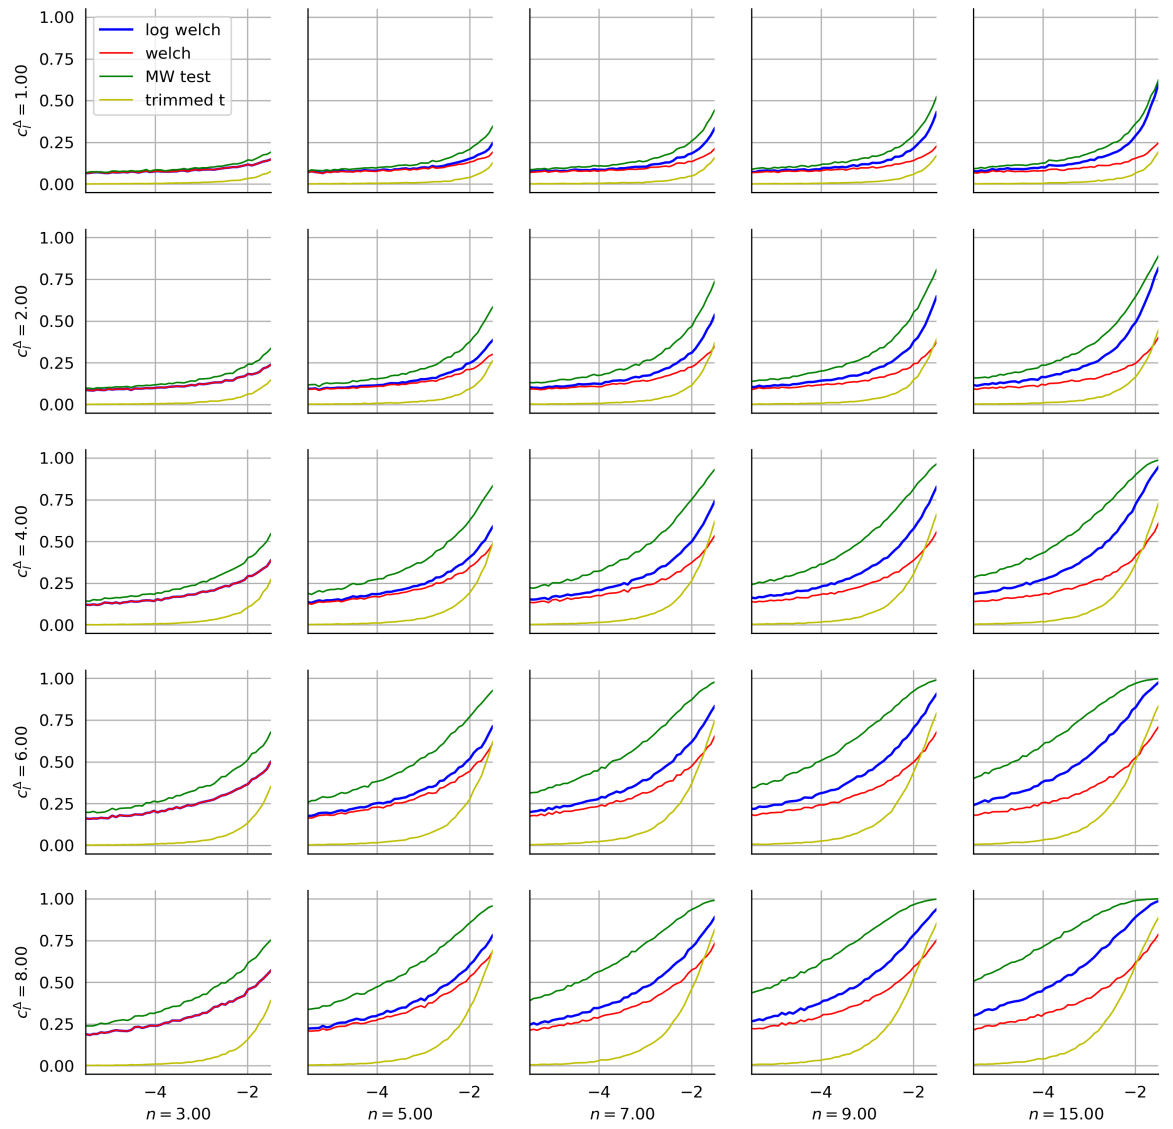

**Figure 27.** Two-group tests evaluated with Beta-binomial distribution

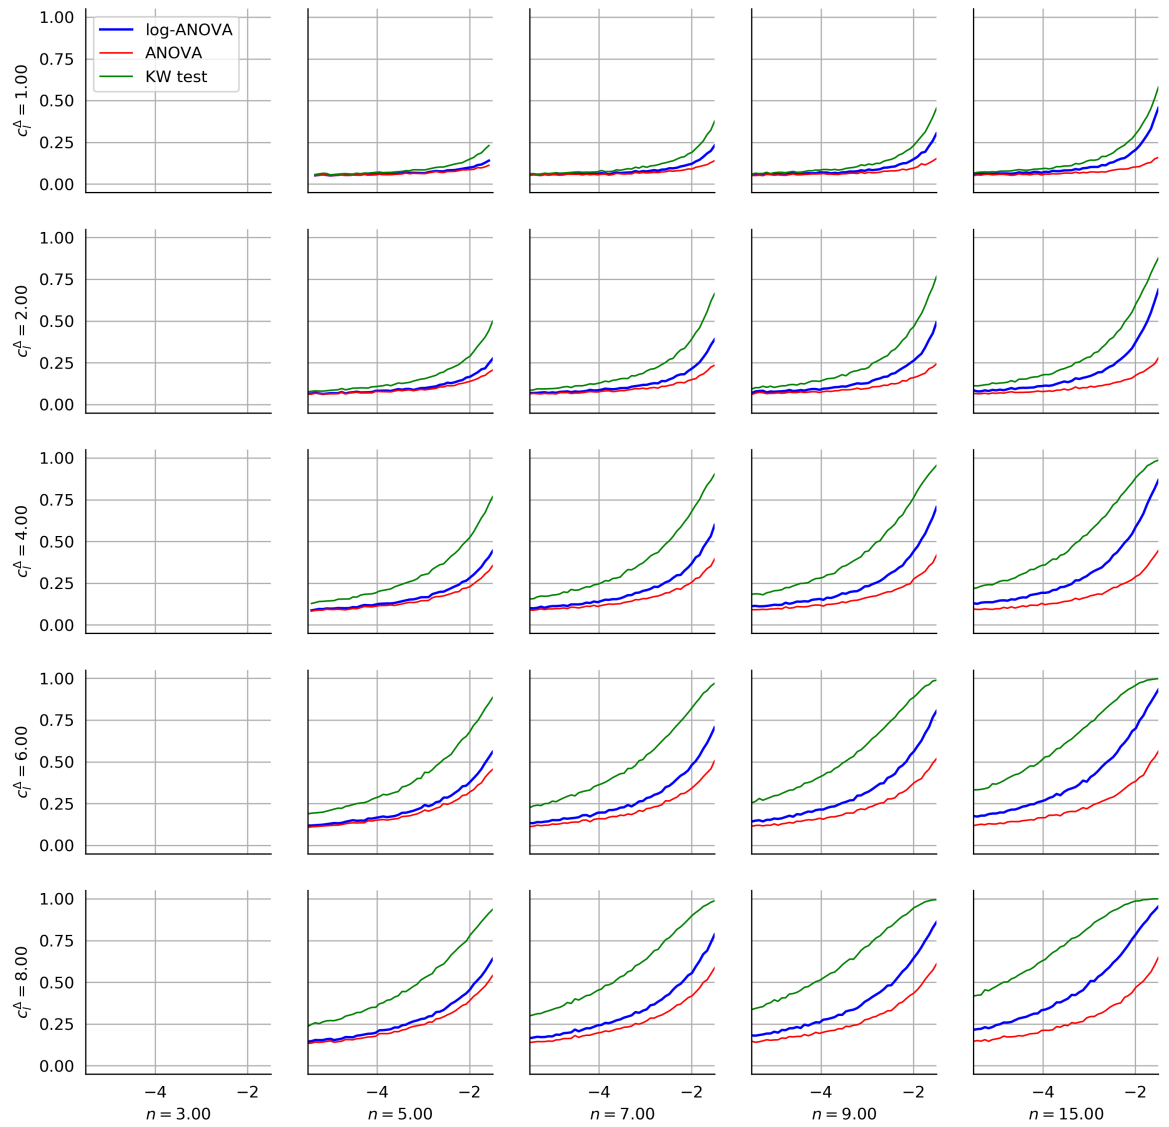

**Figure 28.** Three-group tests evaluated with Beta-binomial distribution

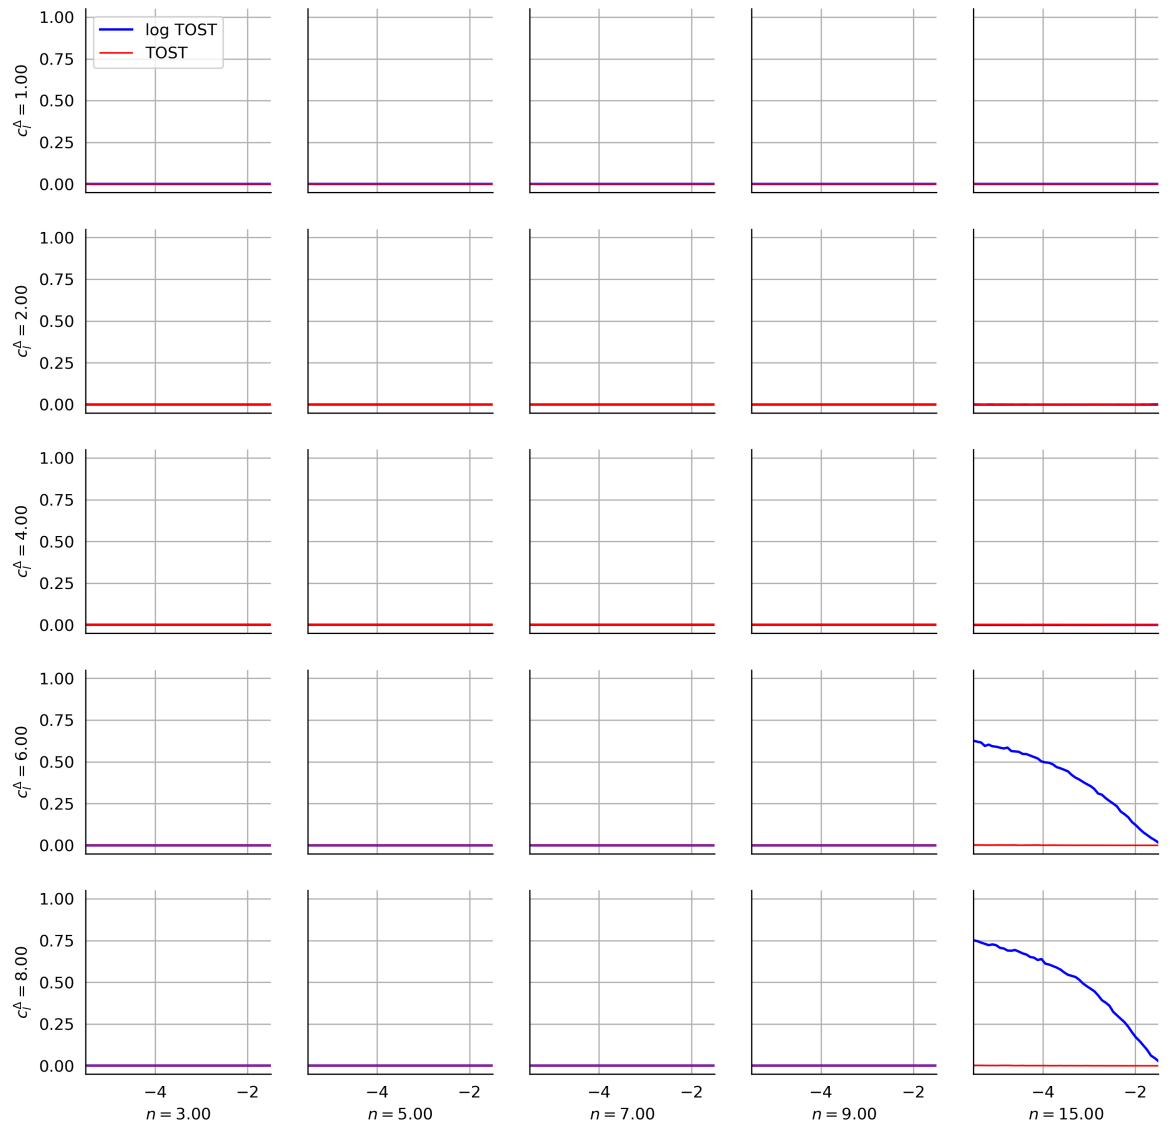

**Figure 29.** TOST procedure evaluated with Beta-binomial distribution

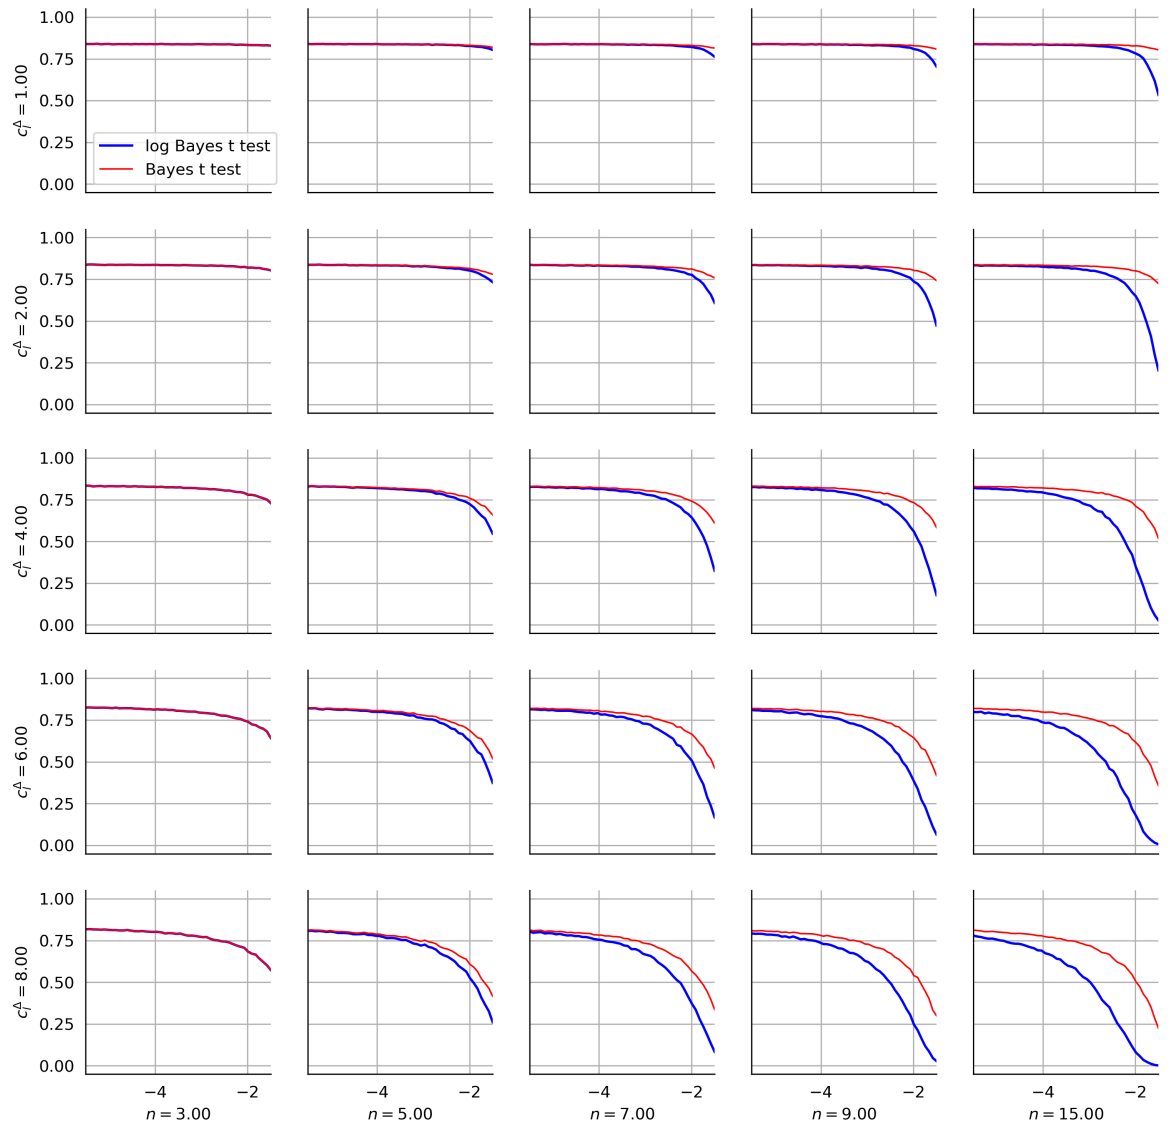

**Figure 30.** Bayesian t test evaluated with Beta-binomial distribution

## 6 ORDERED LOGISTIC REGRESSION MODEL

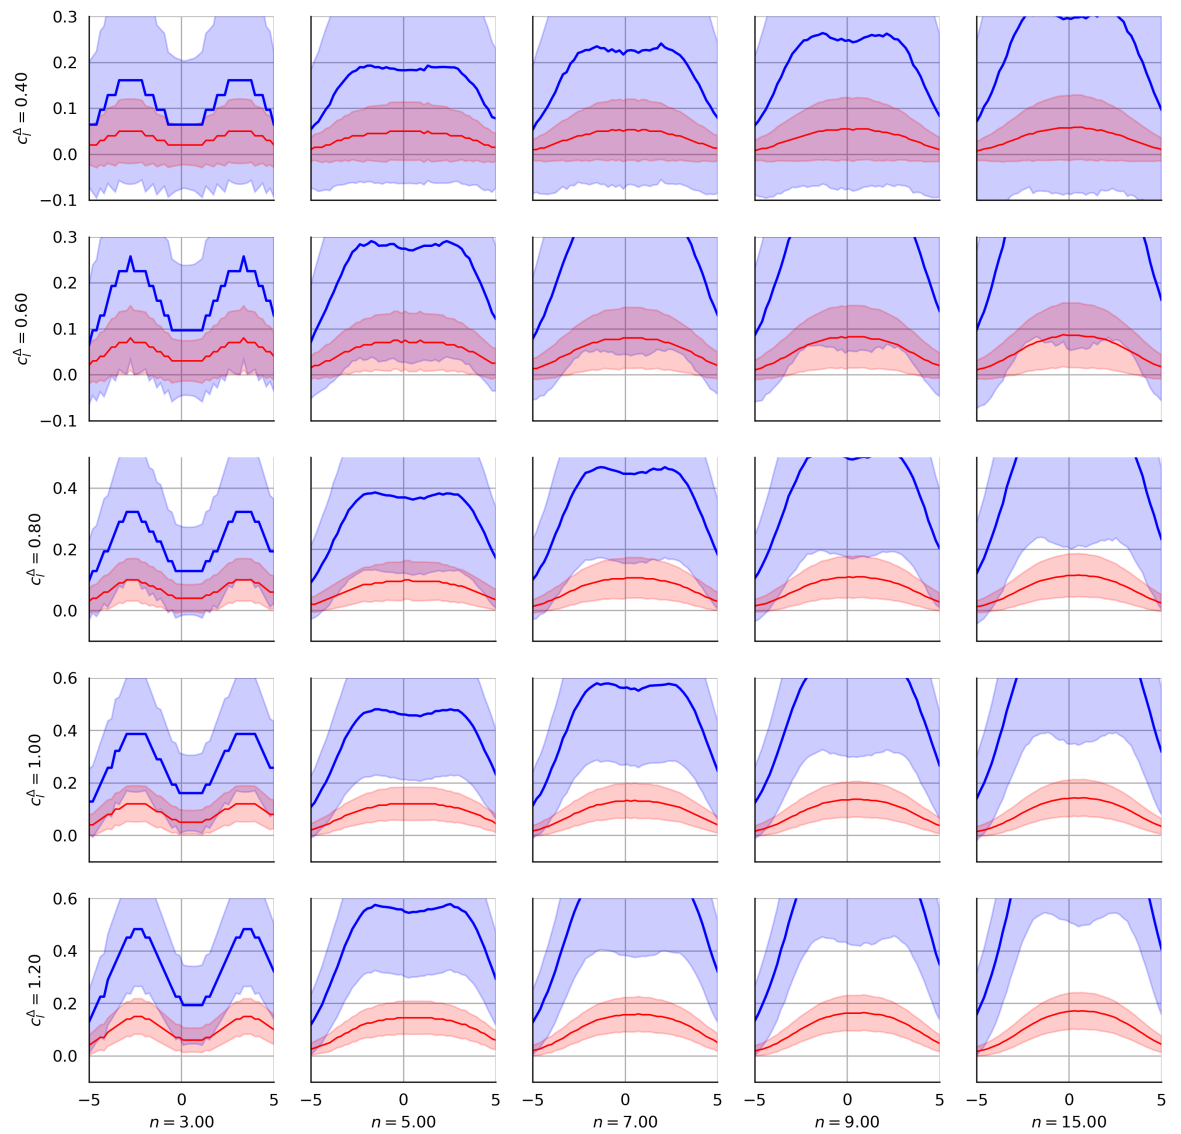

**Figure 31.** Confidence intervals evaluated with Ordered logistic regression model



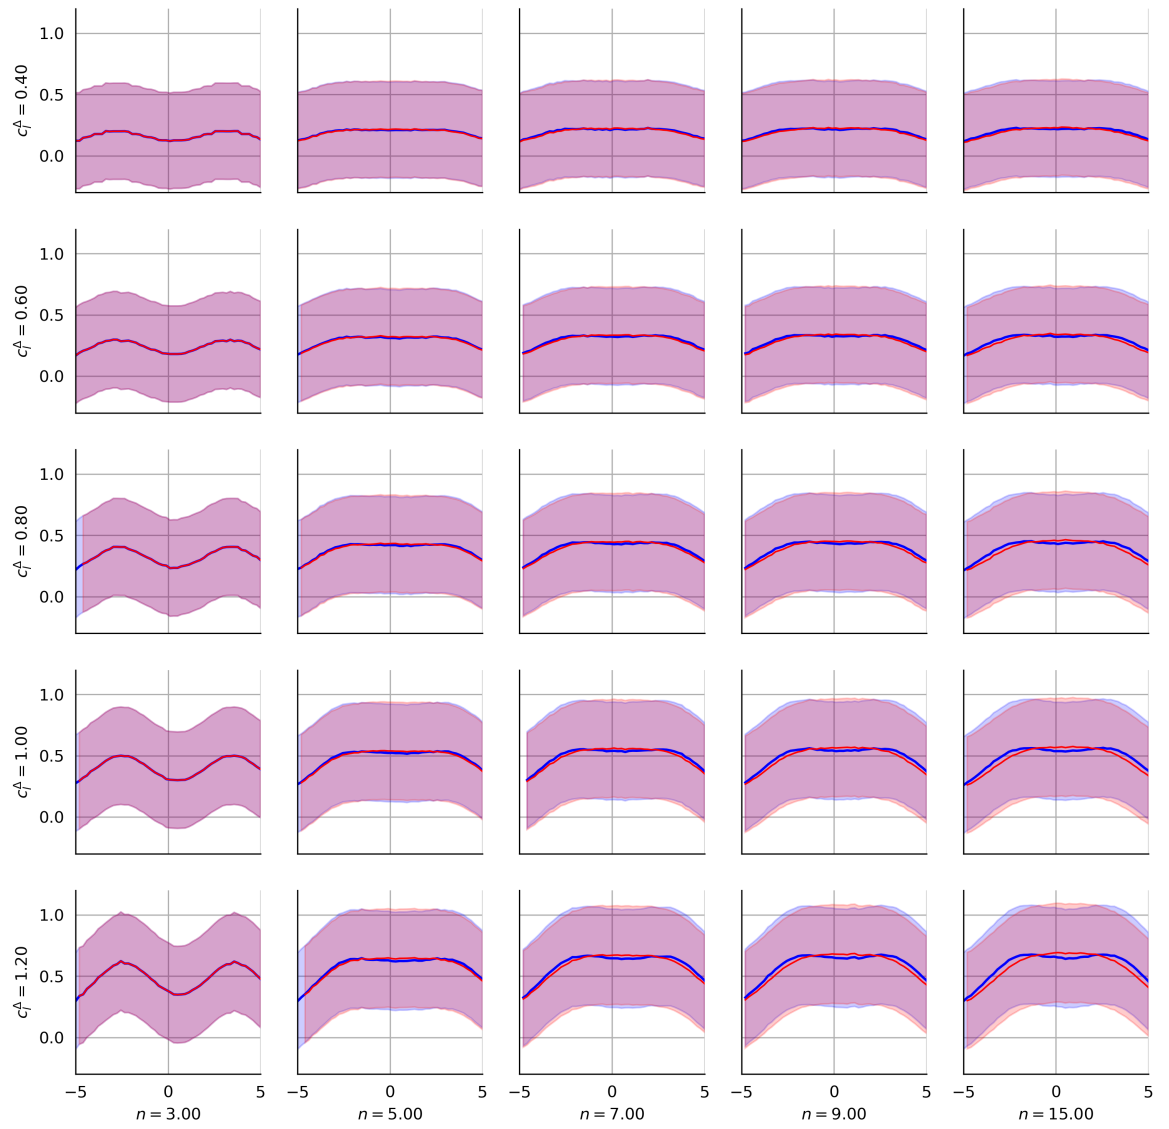

**Figure 32.** Cohen's  $d$  evaluated with Ordered logistic regression model

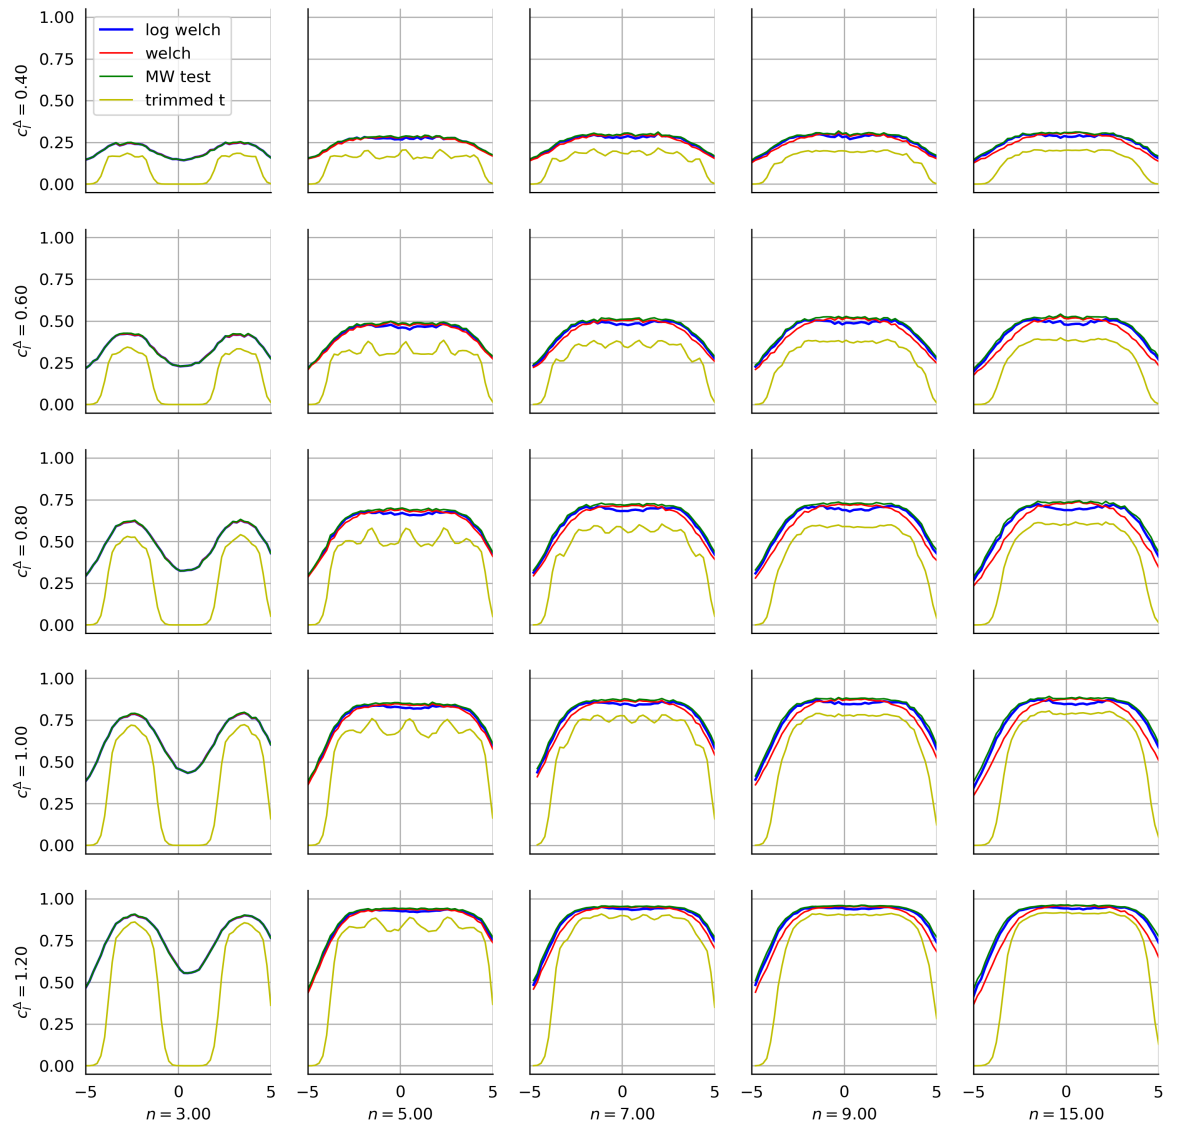

**Figure 33.** Two-group tests evaluated with Ordered logistic regression model

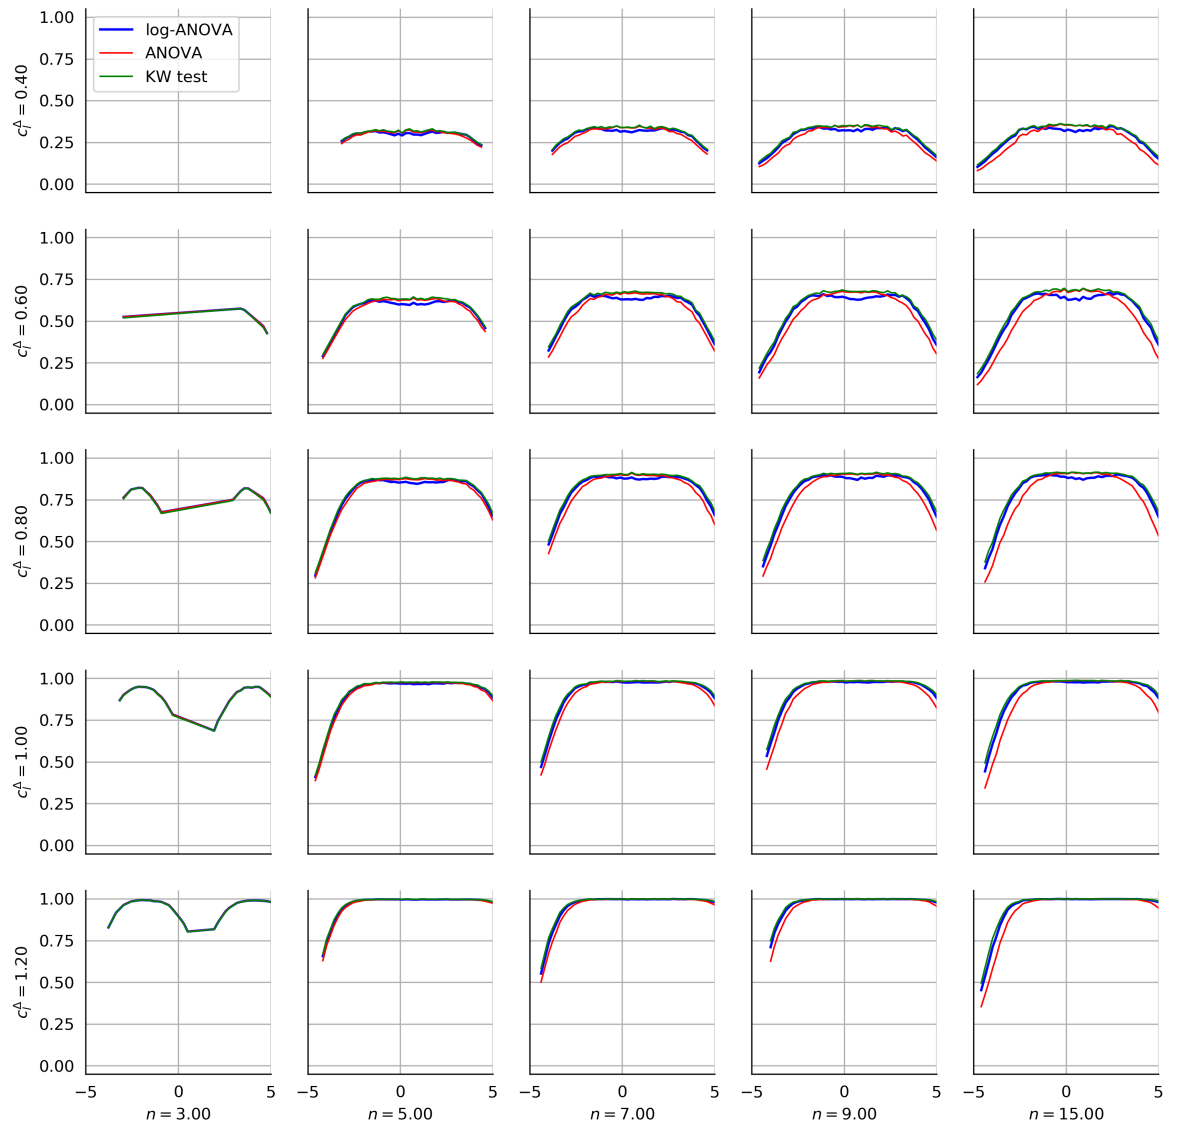

**Figure 34.** Three-group tests evaluated with Ordered logistic regression model

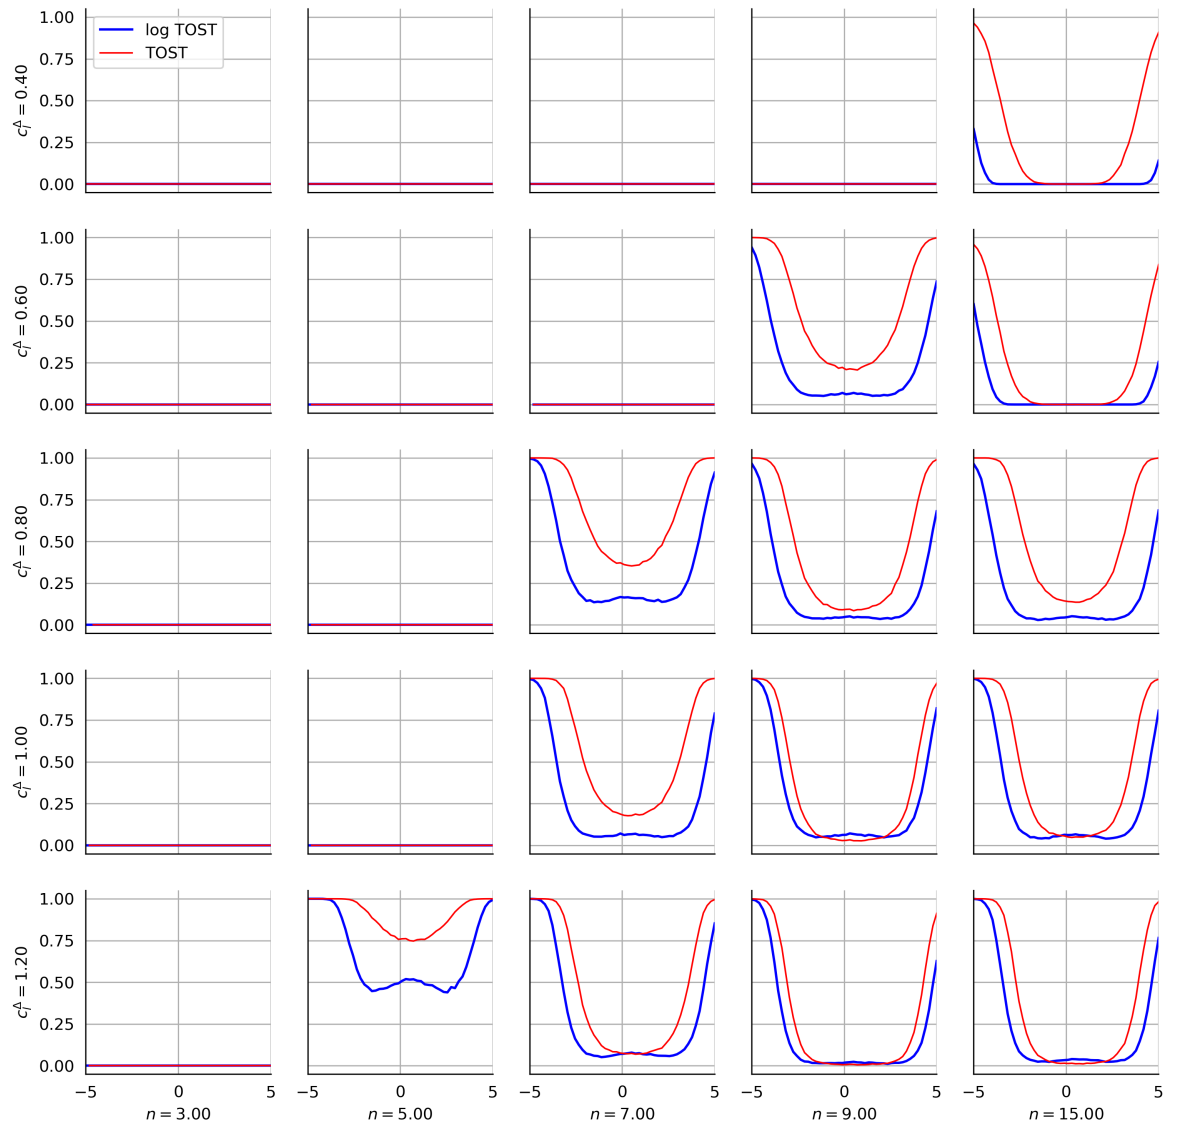

**Figure 35.** TOST procedure evaluated with Ordered logistic regression model

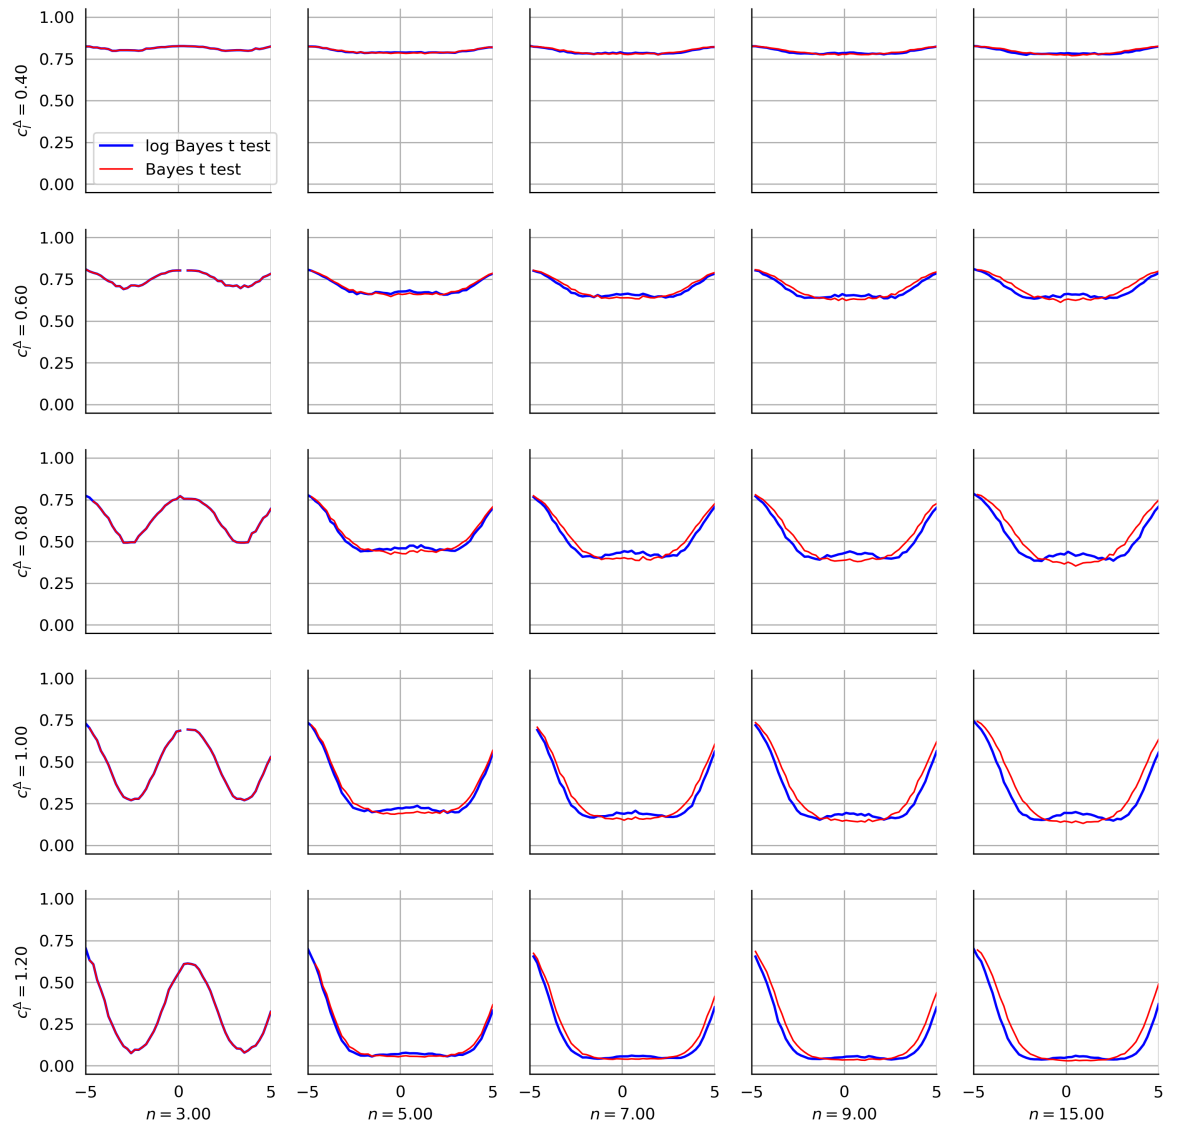

**Figure 36.** Bayesian t test evaluated with Ordered logistic regression model

## 7 ANOVA WITH LARGEST $c_L^\Delta$

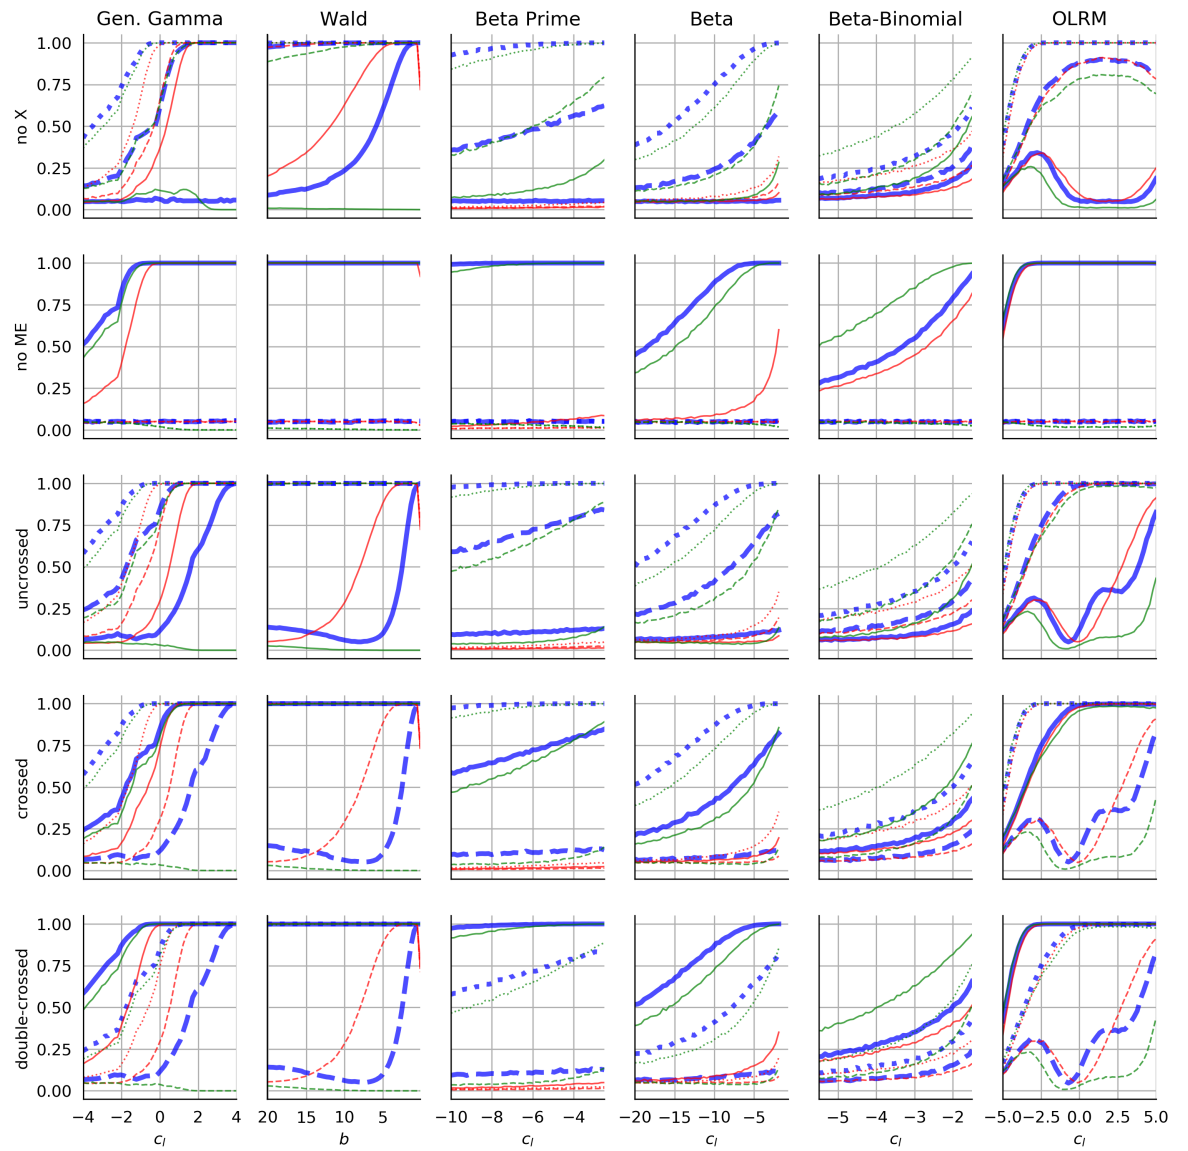

**Figure 37.** ANOVA with largest  $c_L^\Delta$ . The precise value for each distribution is presented as the upper bound in fourth column in table 2 in the published article.
